# Supplementary material for: Unexpected hydrazine hydrate-mediated aerobic oxidation of aryl/ heteroaryl boronic acids to phenols in ambient air
Source: Royal Society of Chemistry journal article supplement (doi:10.1039/c4ra05589f), 2014-01-01

– Supporting Information –

## **Unexpected Hydrazine Hydrate-Mediated Aerobic Oxidation of Aryl/Heteroaryl boronic Acids to Phenols with Ambient Air**

Yanzhen Zhong, Linxin Yuan, Zheng Huang, Wenchao Gu, Ye Shao, and Wei Han\*

*Jiangsu Collaborative Innovation Center of Biomedical Functional Materials, Jiangsu Key Laboratory of  
Biofunctional Materials, Key Laboratory of Applied Photochemistry, School of Chemistry and Materials Science,  
Nanjing Normal University  
Wenyuan Road NO.1, 210023 Nanjing (China)*

*Fax: (+)86-(0)25-8589-1455*

*E-mail: whhanwei@gmail.com*

## Table of Contents

| Content                        | Page |
|--------------------------------|------|
| 1. General procedures          | 1    |
| 2. Analytical methods          | 1    |
| 3. Analytical data of products | 2    |
| 4. References                  | 7    |
| 5. Copies of NMR Spectra       | 8    |

**1. General Procedure for aerobic oxidation of aryl/heteroaryl boronic acids to phenols with ambient Air.** A flask was charged with aryl/heteroaryl boronic acid **1** (0.5 mmol),  $\text{N}_2\text{H}_4 \cdot \text{H}_2\text{O}$  (0.25 mmol, 14.4  $\mu\text{L}$ ),  $\text{Cs}_2\text{CO}_3$  (1.0 mmol, 329.1 mg),  $\text{H}_2\text{O}$  (2.5 mmol, 45.0  $\mu\text{L}$ ), and PEG-400 (2.0 g). Then, the flask was stirred at 80 °C in open air for the indicated time. At the end of the reaction, the reaction mixture was acidified with dilute aqueous HCl and extracted with ethyl acetate (3  $\times$  15 mL). The organic phases were combined, and the volatile components were evaporated under reduced pressure. The crude product was purified by column chromatography on silica gel (petroleum ether/ ethyl acetate).

### 2. Analytical methods

$^1\text{H}$  and  $^{13}\text{C}$  NMR spectra of solutions in  $\text{CDCl}_3$  or  $\text{DMSO}-d_6$  were recorded on a Bruker Avance 400 instrument. Chemical shifts were expressed in parts per million (ppm) downfield from tetramethylsilane and refer to the solvent signals ( $\text{CDCl}_3$  : H 7.24 and C 77.0 ppm;  $\text{DMSO}-d_6$  : H 2.50 and C 39.5 ppm). The signals of water were observed at about 1.58 ppm and 3.34 ppm in  $\text{CDCl}_3$  and  $\text{DMSO}-d_6$ , respectively. Abbreviations for signal couplings are: br, broad; s, singlet; d, doublet; t, triplet; m, multiplet; dd, doublet of doublets; dt, triplet of doublets; td, doublet of triplets; tt, triplet of triplets; ddd, doublet of doublet of doublets; tdd, doublet of doublet of triplets. Coupling constants,  $J$ , were reported in hertz unit (Hz).

### 3. Analytical data of products

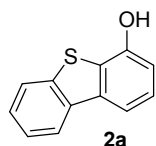

**Dibenzothiophen-4-ol (2a):** Following general procedure, **2a** was isolated as a light pink solid (86% yield), known compound. The NMR spectroscopic data agree with those described in ref.<sup>S1</sup> <sup>1</sup>H NMR (400 MHz, DMSO-*d*<sub>6</sub>):  $\delta$  10.5 (br s, 1 H), 8.29–8.26 (m, 1 H), 8.02–7.99 (m, 1 H), 7.80 (dd,  $J = 8.0, 4.0$  Hz, 1 H), 7.52–7.45 (m, 2 H), 7.34 (t,  $J = 8.0$  Hz, 1 H), 6.95 ppm (dd,  $J = 8.0, 4.0$  Hz, 1 H); <sup>13</sup>C NMR (100 MHz, DMSO-*d*<sub>6</sub>):  $\delta$  152.3, 138.7, 136.9, 135.7, 126.9, 126.2, 125.6, 124.6, 123.2, 122.2, 112.9, 111.5 ppm; mp 166.3–167.1 °C (lit.<sup>S1</sup> mp 158–160 °C).

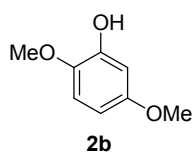

**2,5-Dimethoxyphenol (2b):** Following general procedure, **2b** was isolated as a light yellow liquid (91% yield), known compound. The NMR spectroscopic data agree with those described in ref.<sup>S2</sup> <sup>1</sup>H NMR (400 MHz, CDCl<sub>3</sub>):  $\delta$  6.75 (d,  $J = 8.0$  Hz, 1 H), 6.54 (d,  $J = 4.0$  Hz, 1 H), 7.64 (dd,  $J = 8.0, 4.0$  Hz, 1 H), 5.65 (s, 1 H), 3.82 (s, 3 H), 3.73 ppm (s, 3 H); <sup>13</sup>C NMR (100 MHz, CDCl<sub>3</sub>):  $\delta$  154.5, 146.4, 140.9, 111.4, 104.2, 101.7, 56.6, 55.6 ppm.

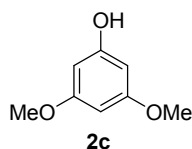

**3,5-Dimethoxyphenol (2c):** Following general procedure, **2c** was isolated as a light brown oil. (92% yield), known compound. The NMR spectroscopic data agree with those described in ref.<sup>S3</sup> <sup>1</sup>H NMR (400 MHz, CDCl<sub>3</sub>):  $\delta$  6.04 (t,  $J = 2.0$  Hz, 1 H), 6.02 (d,  $J = 2.0$  Hz, 2 H), 4.73 (br s, 1 H), 3.71 ppm (s, 6 H); <sup>13</sup>C NMR (100 MHz, CDCl<sub>3</sub>):  $\delta$  161.5, 157.6, 94.3, 92.9, 55.3 ppm.

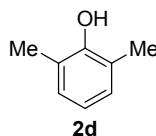

**2,6-Dimethylphenol (2d):** Following general procedure A, **2d** was isolated as a white solid (96% yield), known compound. The NMR spectroscopic data agree with those described in ref.<sup>S1</sup> <sup>1</sup>H NMR (400 MHz, CDCl<sub>3</sub>):  $\delta$  6.96 (d,  $J = 8.0$  Hz, 2 H), 6.74 (t,  $J = 8.0$  Hz, 1 H), 4.58 (br s, 1 H), 2.24 ppm (s, 6 H); <sup>13</sup>C NMR (100 MHz, CDCl<sub>3</sub>):  $\delta$  152.1, 128.6, 122.9, 120.2, 15.8 ppm; mp 42.8–44.2 °C (lit.<sup>S1</sup> mp 43–45 °C).

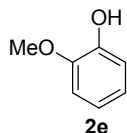

**2-Methoxyphenol (2e):** Following general procedure, **2e** was isolated as a light yellow oil (97% yield), known compound. The NMR spectroscopic data agree with those described in ref.<sup>S1</sup> <sup>1</sup>H NMR (400 MHz, CDCl<sub>3</sub>): δ 6.94–6.91 (m, 1 H), 6.89–6.84 (m, 3 H), 5.64 (br s, 1 H), 3.87 ppm (s, 3 H); <sup>13</sup>C NMR (100 MHz, CDCl<sub>3</sub>): δ 146.5, 145.6, 121.4, 120.1, 114.5, 110.7, 55.8 ppm.

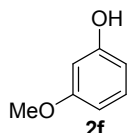

**3-Methoxyphenol (2f):** Following general procedure, **2f** was isolated as a light yellow oil (83% yield), known compound. The NMR spectroscopic data agree with those described in ref.<sup>S1</sup> <sup>1</sup>H NMR (400 MHz, CDCl<sub>3</sub>): δ 7.11 (t, *J* = 8.0 Hz, 1 H), 6.49–6.30 (m, 3 H), 4.14 (br s, 1 H), 3.76 ppm (s, 3 H); <sup>13</sup>C NMR (100 MHz, CDCl<sub>3</sub>): δ 160.9, 156.9, 130.1, 107.9, 106.3, 101.6, 55.3 ppm.

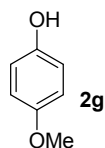

**4-Methoxyphenol (2g):** Following general procedure, **2g** was isolated as a low melting point solid (98% yield), known compound. The NMR spectroscopic data agree with those described in ref.<sup>S1</sup> <sup>1</sup>H NMR (400 MHz, CDCl<sub>3</sub>): δ 6.79–6.73 (m, 4 H), 4.86 (br s, 1 H), 3.75 ppm (s, 3 H); <sup>13</sup>C NMR (100 MHz, CDCl<sub>3</sub>): δ 153.7, 149.4, 116.0, 114.8, 55.8 ppm.

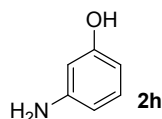

**3-Aminophenol (2h):** Following general procedure, **2h** was isolated as a white solid (85% yield), known compound. The NMR spectroscopic data agree with those described in ref.<sup>S4</sup> <sup>1</sup>H NMR (400 MHz, DMSO-*d*<sub>3</sub>): δ 8.86 (br s, 1 H), 6.80–6.76 (m, 1 H), 6.02–6.00 (m, 2 H), 5.96–5.93 (m, 1 H), 4.92 ppm (br s, 2 H); <sup>13</sup>C NMR (100 MHz, DMSO-*d*<sub>3</sub>): δ 158.1, 149.8, 129.5, 105.6, 103.5, 101.1 ppm; mp 118.8–120.2 °C (lit.<sup>S4</sup> mp 120–121 °C).

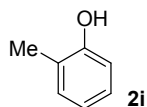

**2-Methylphenol (2i):** Following general procedure, **2i** was isolated as a low melting point solid (91% yield), known compound. The NMR spectroscopic data agree with those described in ref.<sup>S5</sup> <sup>1</sup>H NMR (400 MHz, CDCl<sub>3</sub>): δ 7.13–7.06 (m, 2 H), 6.85 (td, *J* = 8.0, 0.8 Hz, 1 H), 6.76 (d, *J* = 8.0 Hz, 2 H), 4.78 (br s, 1 H), 2.25 ppm (s, 3 H); <sup>13</sup>C NMR (100 MHz, CDCl<sub>3</sub>): δ 153.7, 131.0, 127.1, 123.7, 120.7, 114.8, 15.7 ppm.

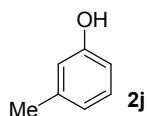

**3-Methylphenol (2j):** Following general procedure, **2j** was isolated as a colorless oil (95% yield), known compound. The NMR spectroscopic data agree with those described in ref.<sup>S6</sup> <sup>1</sup>H NMR (400 MHz, CDCl<sub>3</sub>): δ 7.13 (t, *J* = 8.0 Hz, 1 H), 6.76 (d, *J* = 8.0 Hz, 1 H), 6.67–6.64 (m, 2 H), 4.89 (br s, 1 H), 2.30 ppm (s, 3 H); <sup>13</sup>C NMR (100 MHz, CDCl<sub>3</sub>): δ 155.3, 139.8, 129.4, 121.6, 116.0, 112.3, 21.3 ppm.

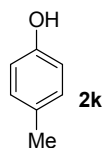

**4-Methylphenol (2k):** Following general procedure, **2k** was isolated as a low melting point solid (90% yield), known compound. The NMR spectroscopic data agree with those described in ref.<sup>S6</sup> <sup>1</sup>H NMR (400 MHz, CDCl<sub>3</sub>): δ 7.02–6.91 (dd, *J* = 8.0, 0.8 Hz, 2 H), 6.72 (d, *J* = 8.0 Hz, 2 H), 4.49 (br s, 1 H), 2.26 ppm (s, 3 H); <sup>13</sup>C NMR (100 MHz, CDCl<sub>3</sub>): δ 153.2, 130.0, 129.9, 115.0, 20.4 ppm.

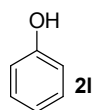

**Phenol (2l):** Following general procedure A, **2l** was isolated as a white yellow solid (87% yield), known compound. The NMR spectroscopic data agree with those described in ref.<sup>S1</sup> <sup>1</sup>H NMR (400 MHz, CDCl<sub>3</sub>): δ 7.24 (t, *J* = 8.0 Hz, 2 H), 6.93 (t, *J* = 8.0 Hz, 1 H), 6.83 (d, *J* = 8.0 Hz, 2 H), 4.84 ppm (br s, 1 H); <sup>13</sup>C NMR (100 MHz, CDCl<sub>3</sub>): δ 155.3, 129.7, 120.8, 115.3 ppm; mp 41.2–42.6 °C (lit.<sup>S1</sup> mp 40–42 °C).

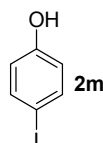

**4-Iodophenol (2m):** Following general procedure A, **2m** was isolated as a light yellow solid (98% yield), known compound. The NMR spectroscopic data agree with those described in ref.<sup>S1</sup> <sup>1</sup>H NMR (400 MHz, CDCl<sub>3</sub>): δ 7.49 (d, *J* = 8.0 Hz, 2 H), 6.61 (d, *J* = 8.0 Hz, 2 H), 5.03 ppm (br s, 1 H); <sup>13</sup>C NMR (100 MHz, CDCl<sub>3</sub>): δ 155.3, 138.4, 117.8, 82.7 ppm; mp 63.3–64.2 °C (lit.<sup>S1</sup> mp 90–93 °C).

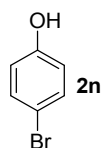

**4-Bromophenol (2n):** Following general procedure, **2n** was isolated as a light yellow solid (96%

yield), known compound. The NMR spectroscopic data agree with those described in ref.<sup>S1</sup> <sup>1</sup>H NMR (400 MHz, CDCl<sub>3</sub>): δ 7.31 (d, *J* = 8.0 Hz, 2 H), 6.71 (d, *J* = 8.0 Hz, 2 H), 4.83 ppm (br s, 1 H); <sup>13</sup>C NMR (100 MHz, CDCl<sub>3</sub>): δ 154.6, 132.4, 117.2, 112.9 ppm; mp 54.3–56.2 °C (lit. <sup>S1</sup> mp 55–58 °C).

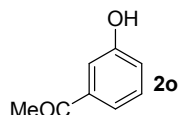

**3-Hydroxyacetophenone (2o):** Following general procedure, **2o** was isolated as a white solid (95% yield), known compound. The NMR spectroscopic data agree with those described in ref.<sup>S7</sup> <sup>1</sup>H NMR (400 MHz, DMSO-*d*<sub>6</sub>): δ 9.79 (s, 1 H), 7.41 (dt, *J* = 8.0, 4.0 Hz, 1 H), 7.32 (t, *J* = 8.0 Hz, 2 H), 7.03 (ddd, *J* = 8.0, 4.0, 2.0 Hz, 1 H), 2.52 ppm (s, 3 H); <sup>13</sup>C NMR (100 MHz, DMSO-*d*<sub>6</sub>): δ 197.8, 157.6, 138.3, 129.8, 120.3, 119.3, 114.3, 26.8 ppm; mp 85.8–86.2 °C (lit.<sup>S7</sup> mp 92–95 °C).

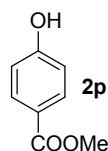

**Methyl 4-Hydroxybenzoate (2p):** Following general procedure, **2p** was isolated as a white solid (97% yield), known compound. The NMR spectroscopic data agree with those described in ref.<sup>S1</sup> <sup>1</sup>H NMR (400 MHz, CDCl<sub>3</sub>): δ 7.94 (d, *J* = 8.0 Hz, 2 H), 6.84 (d, *J* = 8.0 Hz, 2 H), 5.51 (br s, 1 H), 3.87 ppm (s, 1 H); <sup>13</sup>C NMR (100 MHz, CDCl<sub>3</sub>): δ 167.3, 160.1, 131.9, 122.4, 115.2, 52.0 ppm; mp 112.0–113.1 °C (lit. <sup>S1</sup> mp 121–123 °C).

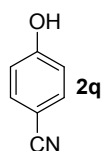

**4-Hydroxybenzonitrile (2q):** Following general procedure, **2q** was isolated as a light yellow solid (98% yield), known compound. The NMR spectroscopic data agree with those described in ref.<sup>S1</sup> <sup>1</sup>H NMR (400 MHz, CDCl<sub>3</sub>): δ 7.53 (d, *J* = 8.0 Hz, 2 H), 6.92 (d, *J* = 8.0 Hz, 2 H), 6.34 ppm (br s, 1 H); <sup>13</sup>C NMR (100 MHz, CDCl<sub>3</sub>): δ 160.4, 134.3, 119.3, 116.5, 102.8 ppm; mp 109.1–111.2 °C (lit.<sup>S1</sup> mp 107–109 °C).

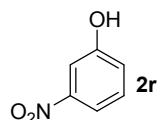

**3-Nitrophenol (2r):** Following general procedure, **2r** was isolated as a light yellow solid (89% yield), known compound. The NMR spectroscopic data agree with those described in ref.<sup>S1</sup> <sup>1</sup>H NMR (400 MHz, CDCl<sub>3</sub>): δ 7.79 (ddd, *J* = 8.0, 4.0, 2.0 Hz, 1 H), 7.70 (t, *J* = 8.0 Hz, 1 H), 7.39 (t, *J* = 8.0, 4.0, 2.0 Hz, 1 H), 7.19 (ddd, *J* = 8.0, 4.0, 2.0 Hz, 1 H), 5.97 ppm (br s, 1 H); <sup>13</sup>C NMR (100 MHz, CDCl<sub>3</sub>): δ 156.3, 149.0, 130.3, 122.1, 115.9, 110.5 ppm; mp 99.0–100.1 °C (lit.<sup>S1</sup> mp 96–99 °C).

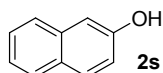

**2-Naphthol (2s):** Following general procedure, **2s** was isolated as a white solid (97% yield), known compound. The NMR spectroscopic data agree with those described in ref.<sup>S1</sup> <sup>1</sup>H NMR (400 MHz, CDCl<sub>3</sub>): δ 7.75 (t, *J* = 8.0 Hz, 2 H), 7.66 (d, *J* = 8.0 Hz, 1 H), 7.44–7.40 (m, 1 H), 7.34–7.30 (m, 1 H), 7.13 (d, *J* = 4.0 Hz, 1 H), 7.11 (td, *J* = 8.0, 4.0 Hz, 2 H), 4.86 ppm (br s, 1 H); <sup>13</sup>C NMR (100 MHz, CDCl<sub>3</sub>): δ 153.3, 134.6, 129.8, 128.9, 127.7, 126.5, 126.4, 123.6, 117.7, 109.5 ppm; mp 116.0–116.8 °C (lit.<sup>S1</sup> mp 121–123 °C).

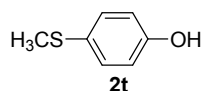

**4-(Methylmercapto)phenol (2t):** Following general procedure A, **2t** was isolated as a white solid (85% yield), known compound. The NMR spectroscopic data agree with those described in ref.<sup>S8</sup> <sup>1</sup>H NMR (400 MHz, CDCl<sub>3</sub>): δ 7.20 (d, *J* = 8.4 Hz, 2 H), 6.77 (d, *J* = 8.4 Hz, 2 H), 5.18 (br s, 1 H), 2.42 ppm (s, 3 H); <sup>13</sup>C NMR (100 MHz, CDCl<sub>3</sub>): δ 154.0, 130.3, 128.8, 116.1, 18.0 ppm; mp 83.4–84.3 °C (lit.<sup>S8</sup> mp 83–85 °C).

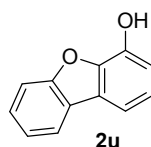

**Dibenzofuran-4-ol (2u):** Following general procedure, **2u** was isolated as a white solid (83% yield), known compound. The NMR spectroscopic data agree with those described in ref.<sup>S1</sup> <sup>1</sup>H NMR (400 MHz, CDCl<sub>3</sub>): δ 7.92 (d, *J* = 8.0 Hz, 1 H), 7.57 (d, *J* = 8.0 Hz, 1 H), 7.51 (dd, *J* = 8.0, 4.0 Hz, 1 H), 7.45 (td, *J* = 8.0, 2.0 Hz, 1 H), 7.34 (td, *J* = 8.0, 2.0 Hz, 1 H), 7.21 (t, *J* = 8.0 Hz, 1 H), 7.02 (dd, *J* = 8.0, 4.0 Hz, 1 H), 5.49 ppm (br s, 1 H); <sup>13</sup>C NMR (100 MHz, CDCl<sub>3</sub>): δ 156.0, 144.0, 141.1, 127.3, 125.7, 124.6, 123.7, 122.9, 121.0, 113.6, 112.8, 111.8 ppm; mp 98.2–100.1 °C (lit.<sup>S1</sup> mp 98–100 °C).

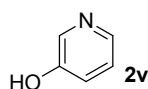

**Pyridin-3-ol (2v):** Following general procedure, **2v** was isolated as a white solid (91% yield), known compound. The NMR spectroscopic data agree with those described in ref.<sup>S7</sup> <sup>1</sup>H NMR (400 MHz, CDCl<sub>3</sub>): δ 8.27 (d, *J* = 4.0 Hz, 1 H), 8.08 (dd, *J* = 8.0, 4.0 Hz, 1 H), 7.32–7.25 ppm (m, 2 H); <sup>13</sup>C NMR (100 MHz, CDCl<sub>3</sub>): δ 155.1, 139.3, 136.5, 125.2, 125.1 ppm; mp 125.0–126.2 °C (lit.<sup>S7</sup> mp 127 °C).

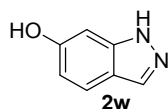

**1H-indazol-6-ol (2w):** Following general procedure, **2w** was isolated as a light yellow solid (96% yield), known compound (CAS: 23244-88-4). <sup>1</sup>H NMR (400 MHz, DMSO-*d*<sub>6</sub>): δ 12.58 (br s, 1 H),

9.57 (br s, 1 H), 7.86 (s, 1 H), 7.52 (d,  $J = 8.0$  Hz, 1 H), 6.78 (s, 1 H), 6.64 ppm (dd,  $J = 8.0, 2.0$  Hz, 1 H);  $^{13}\text{C}$  NMR (100 MHz, DMSO- $d_6$ ):  $\delta$  156.5, 141.5, 133.3, 121.1, 117.0, 112.3, 93.2 ppm; mp 161.8–164.2 °C.

#### 4. References

- [S1] G. A. Molander and L. N. Cavalcanti, *J. Org. Chem.* **2011**, *76*, 623.
- [S2] A. Kirste, G. Schnakenburg and S. R. Waldvogel, *Org. Lett.* **2011**, *13*, 3126.
- [S3] J. Magano, M. H. Chen, J. D. Clark and Thomas Nussbaumer, *J. Org. Chem.* **2006**, *71*, 7103.
- [S4] J. Li, X.-Y. Shi, Y.-Y. Bi, J.-F. Wei and Z.-G. Chen, *ACS Catal.* **2011**, *1*, 657.
- [S5] S. D. Sawant, A. D. Hudwekar, K. A. A. Kumar, V. Venkateswarlu, P. P. Singh and R. A. Vishwakarma, *Tetrahedron Lett.* **2014**, *55*, 811.
- [S6] W. Ding, J.-R. Chen, Y.-Q. Zou, S.-W. Duan, L.-Q. Lu and W.-J. Xiao, *Org. Chem. Front.* **2014**, *1*, 151.
- [S7] K. W. Anderson, T. Ikawa, R. E. Tundel and S. L. Buchwald, *J. Am. Chem. Soc.* **2006**, *128*, 10694.
- [S8] M. Selva and P. Tundo, *J. Org. Chem.* **2006**, *71*, 1464.



## 5. Copies of NMR Spectra

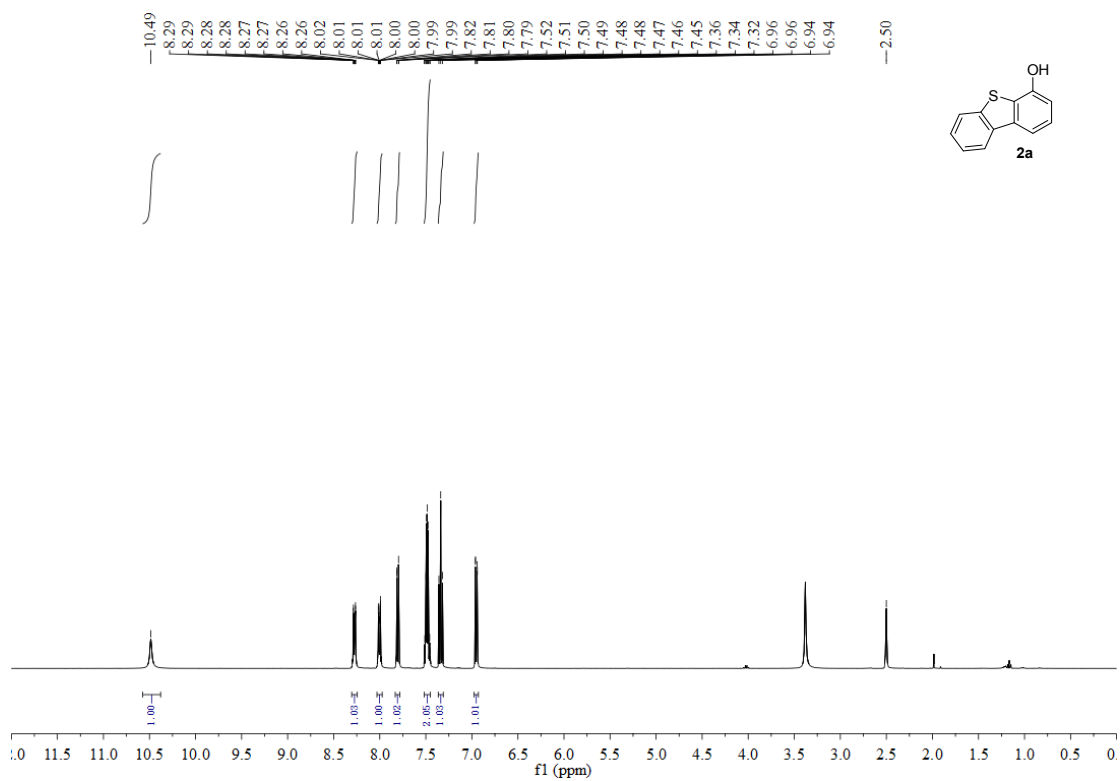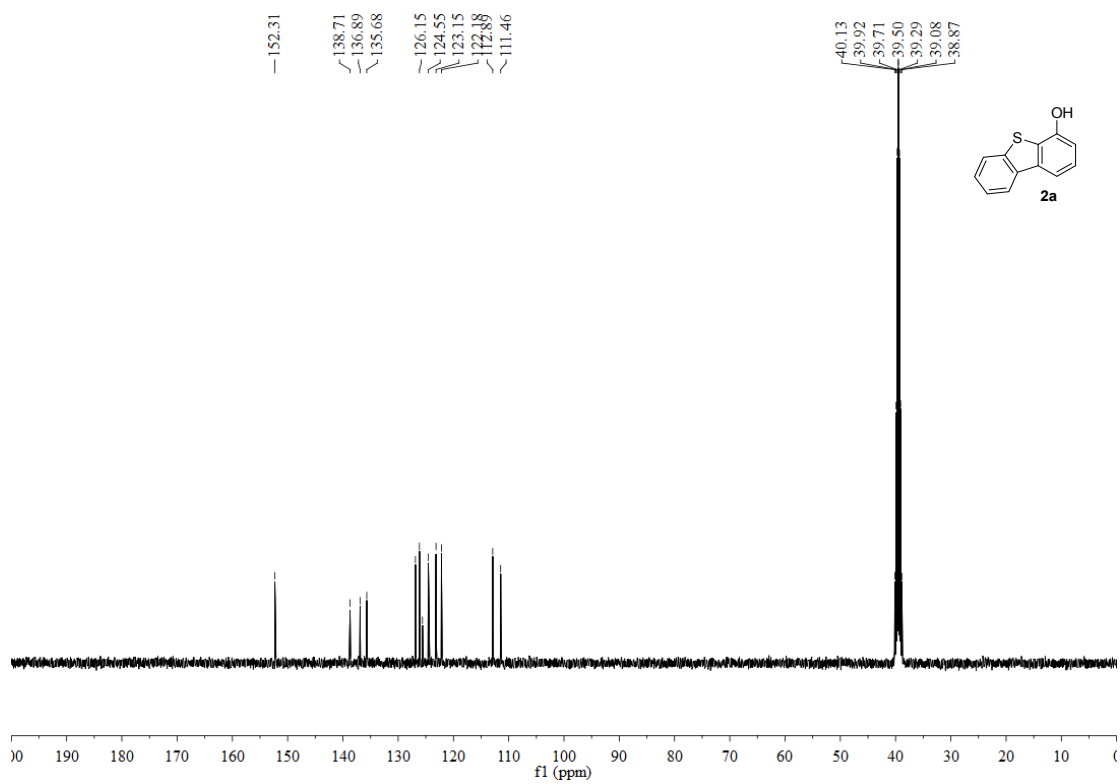

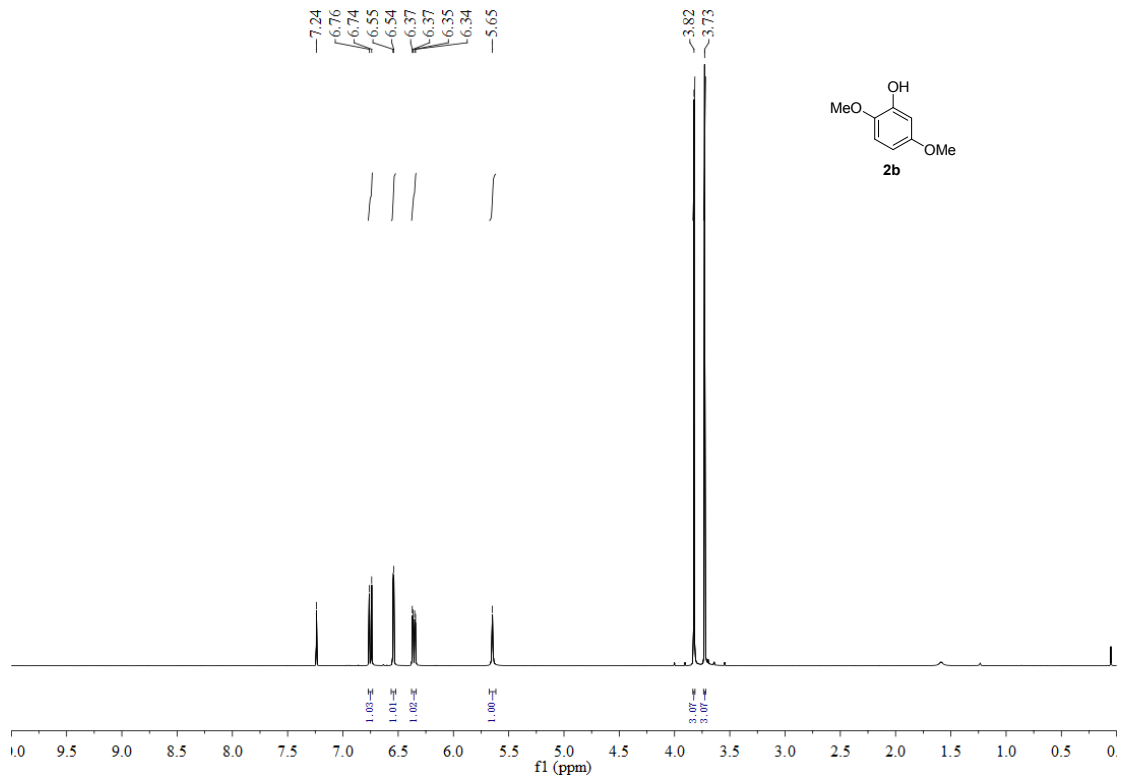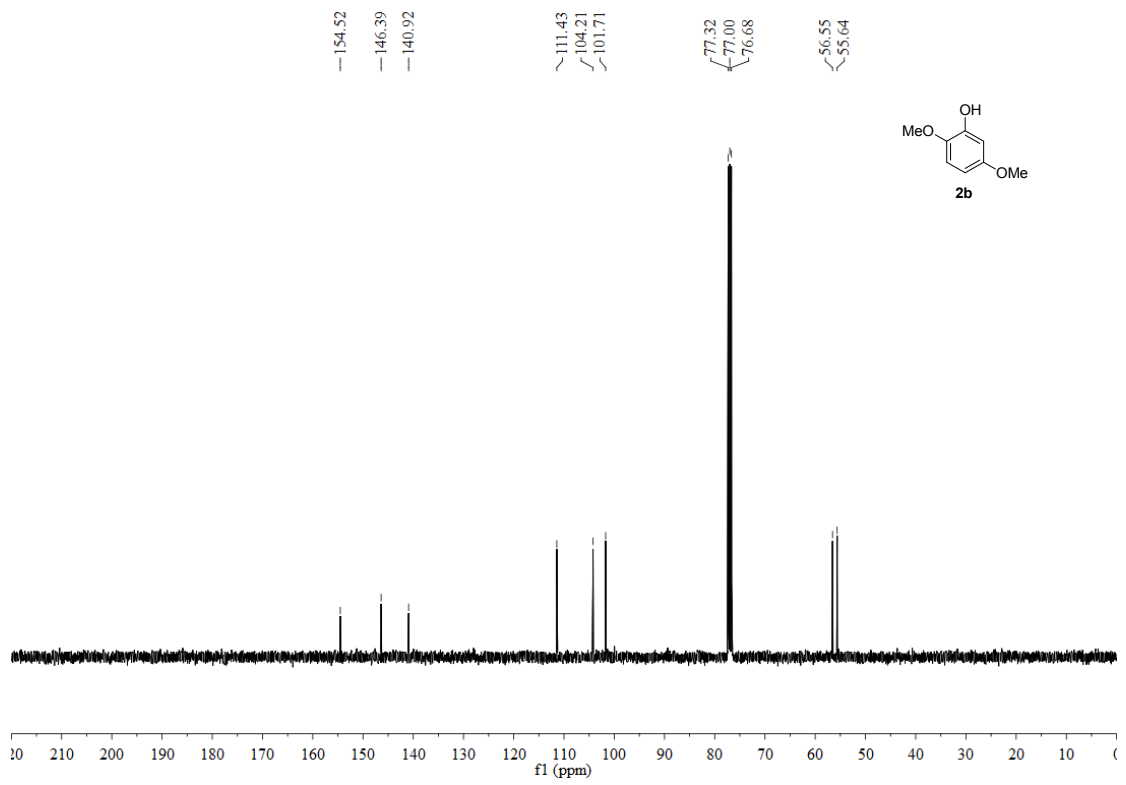

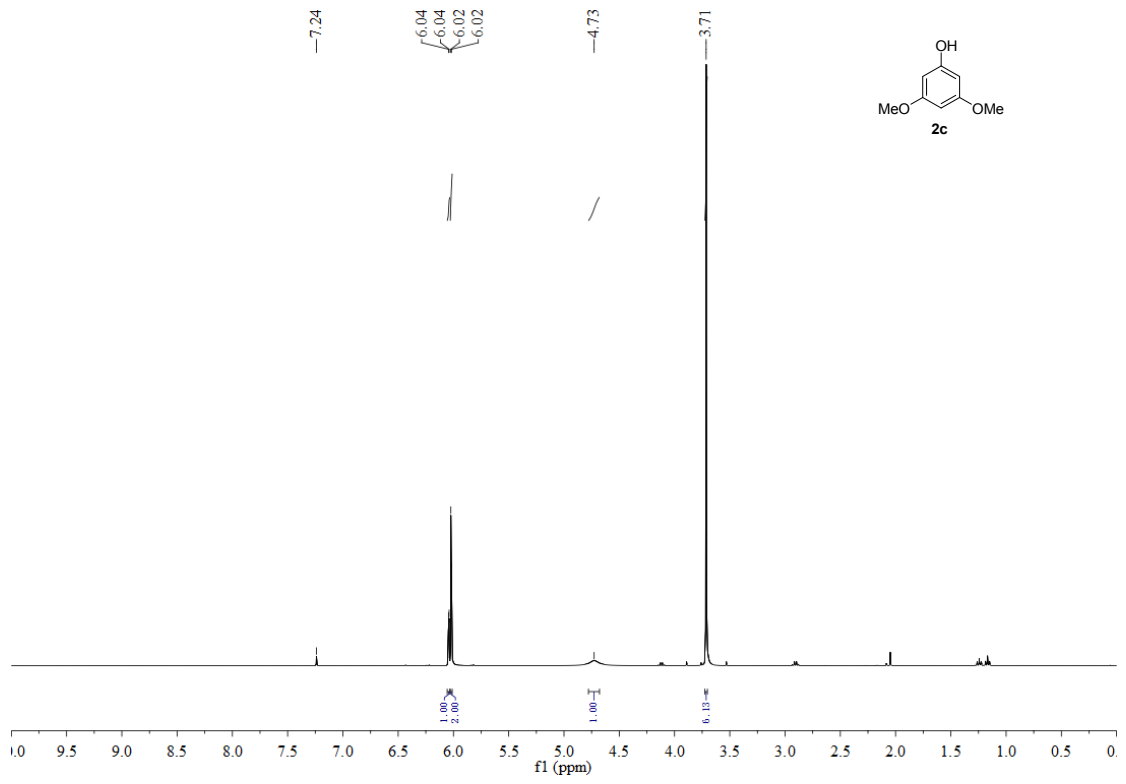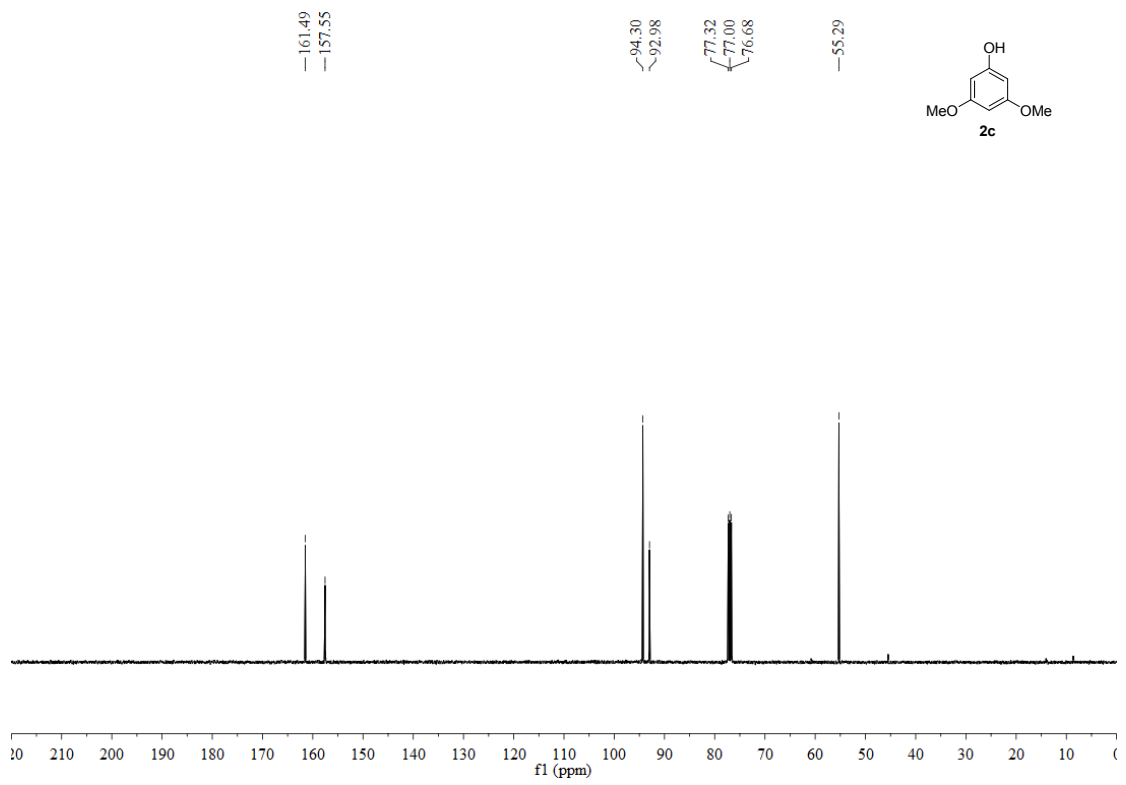

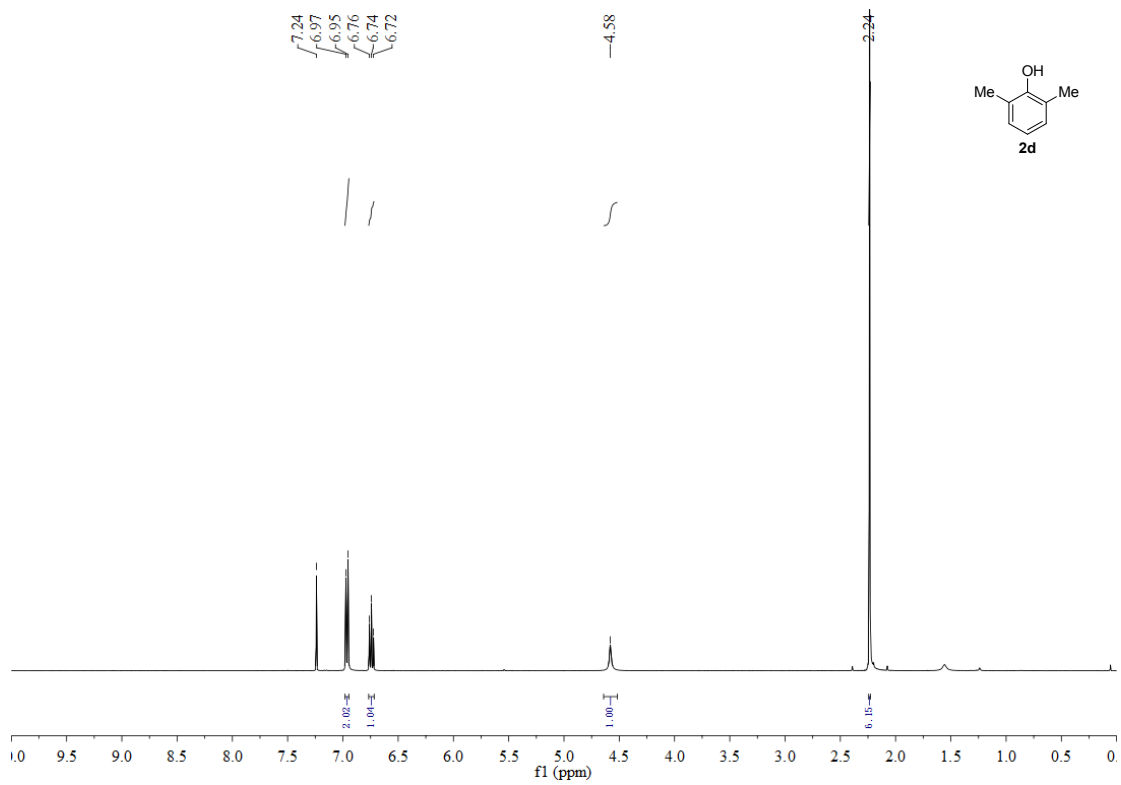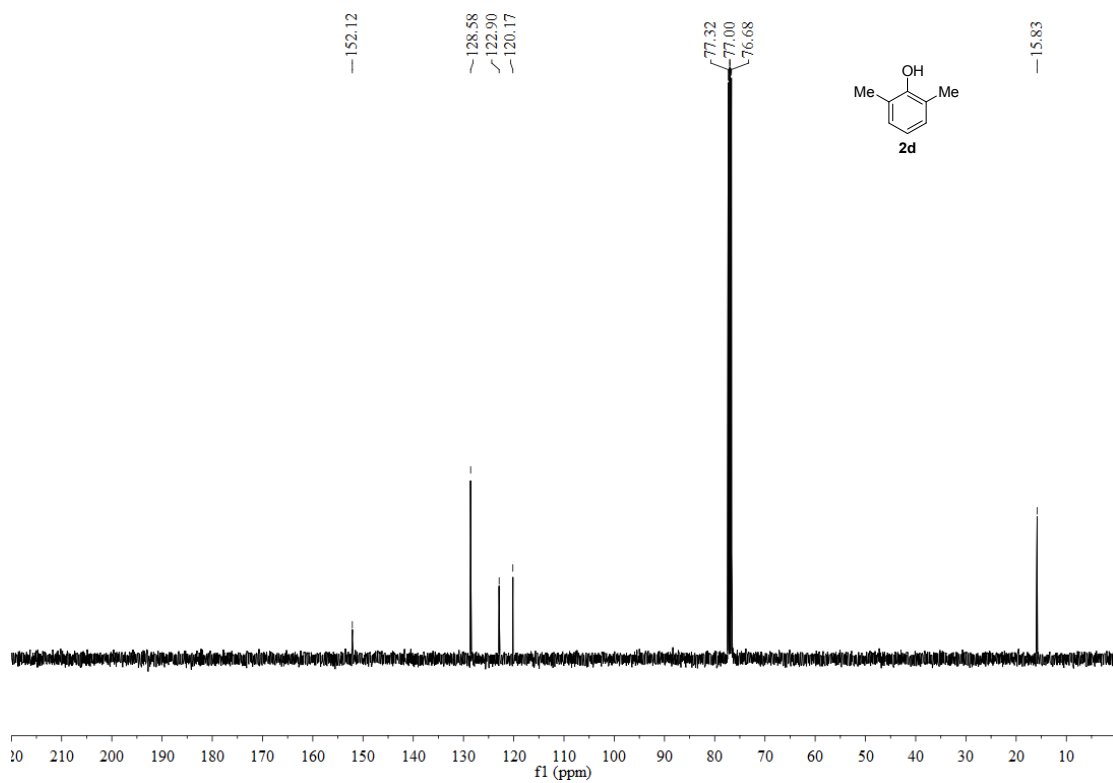

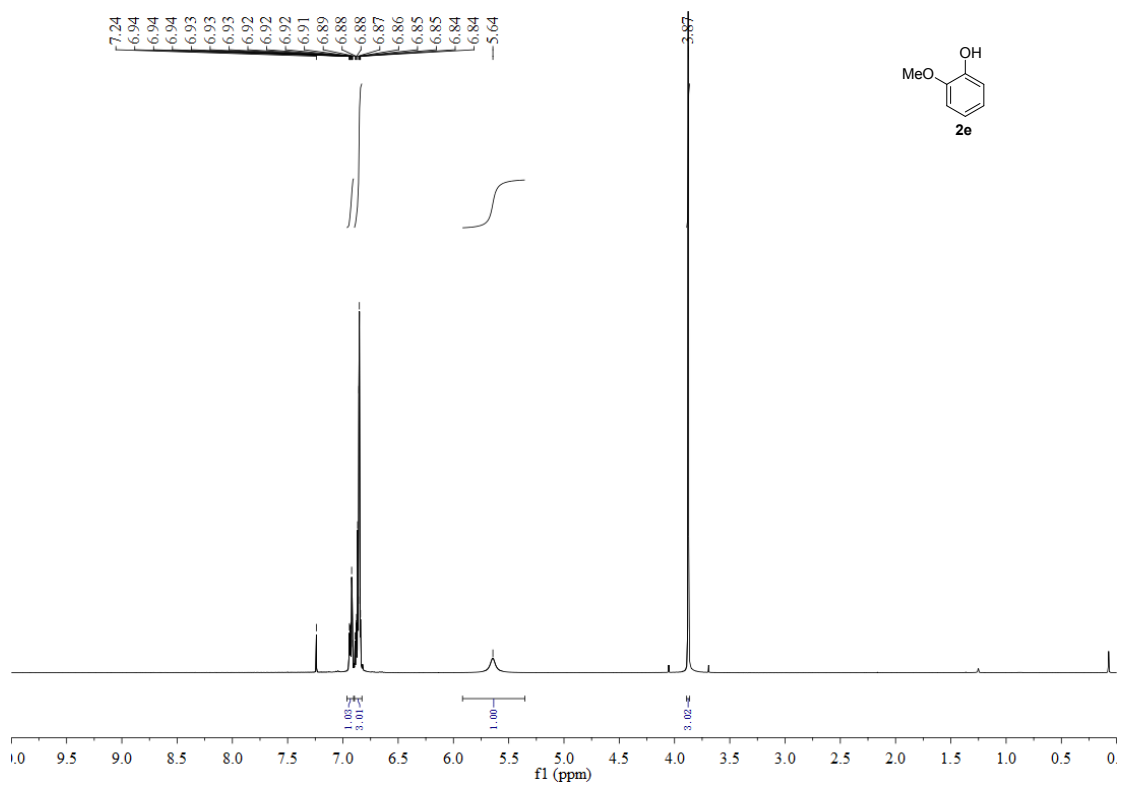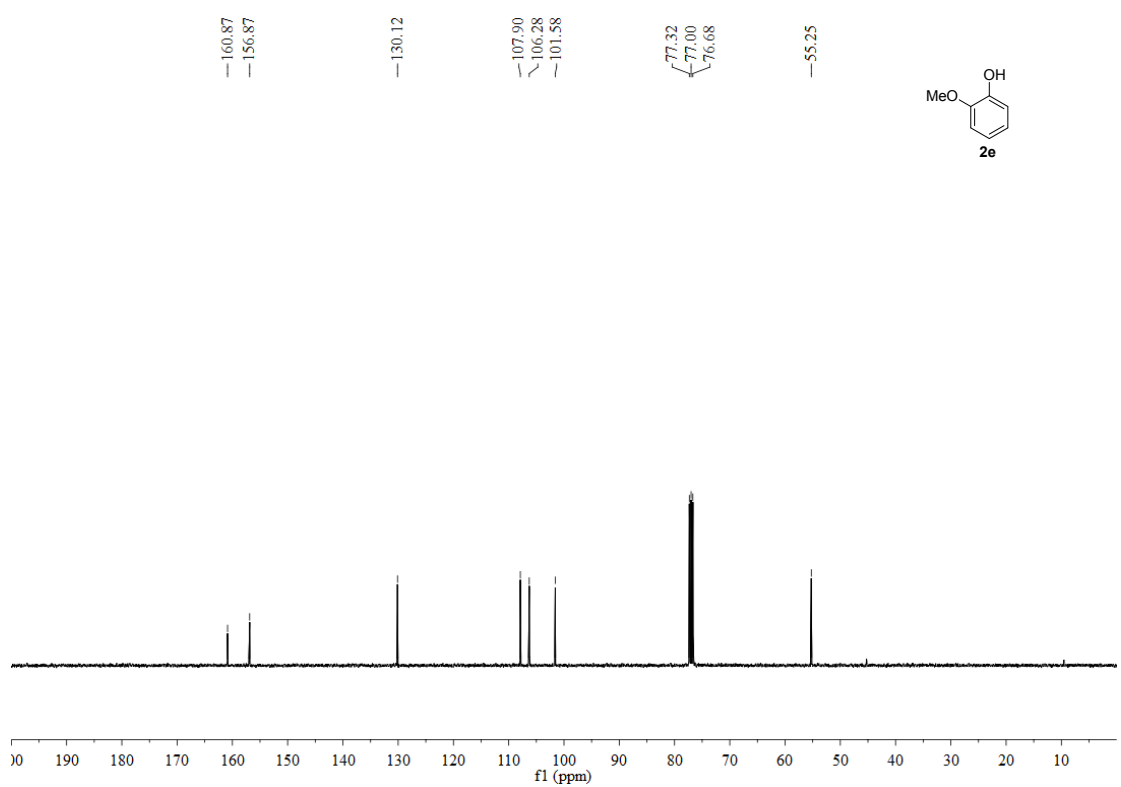

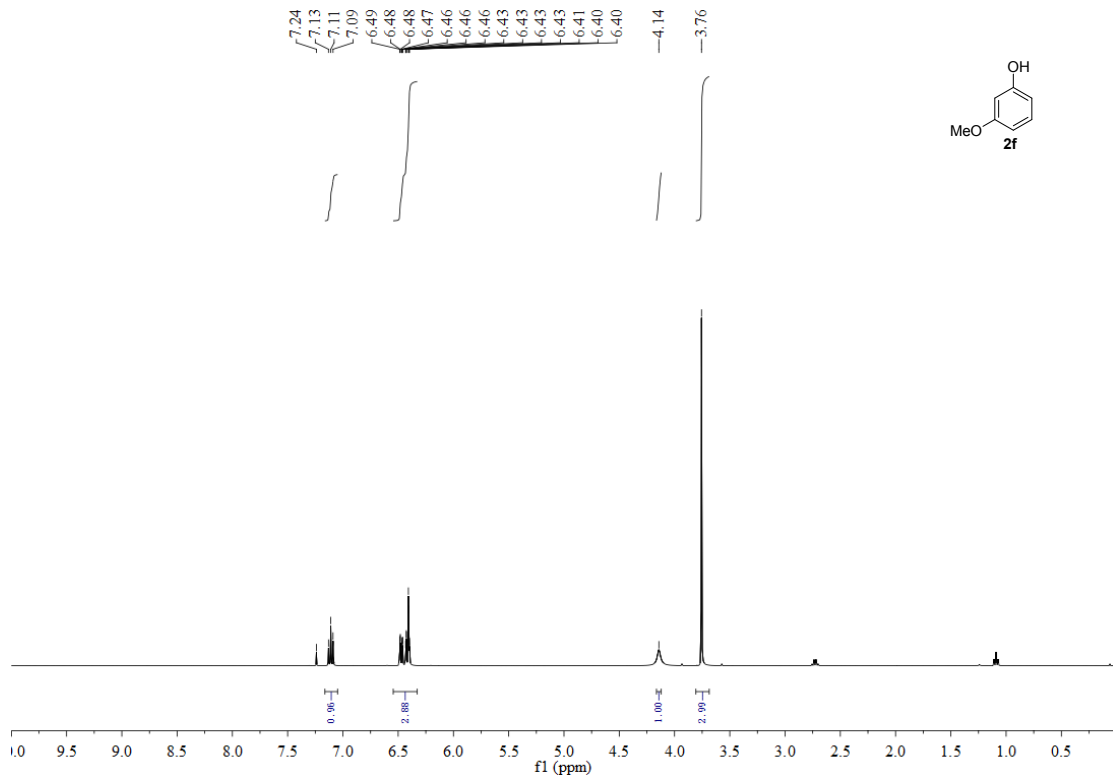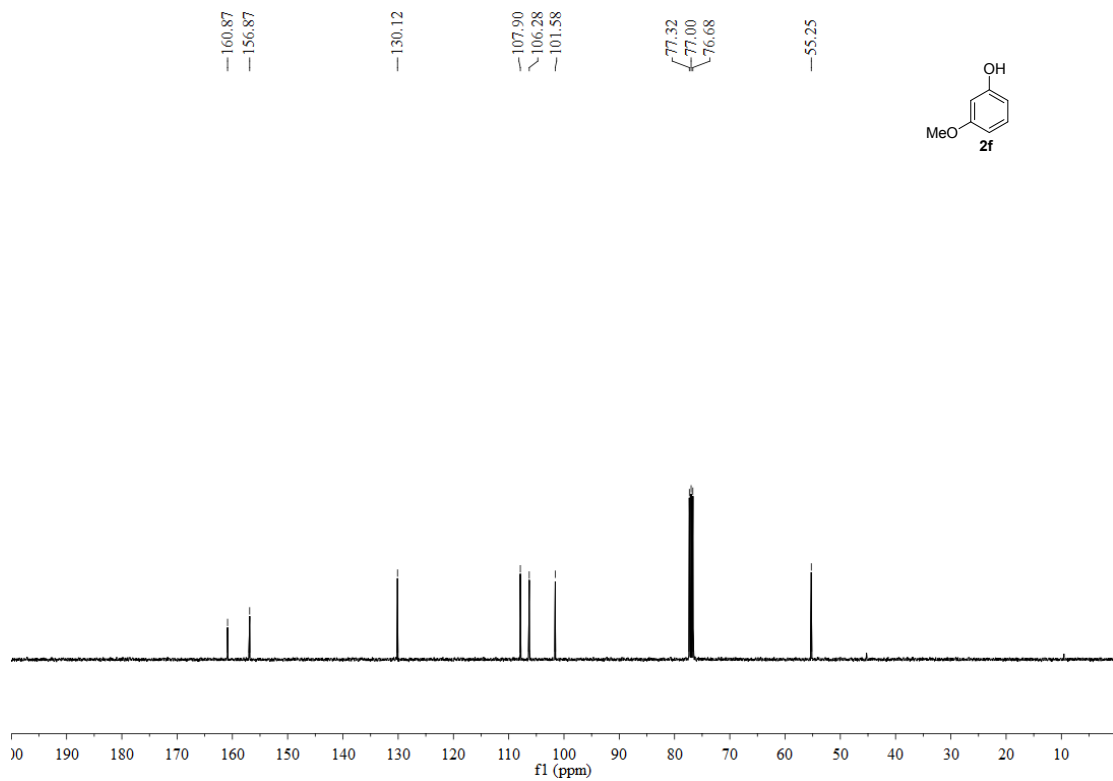

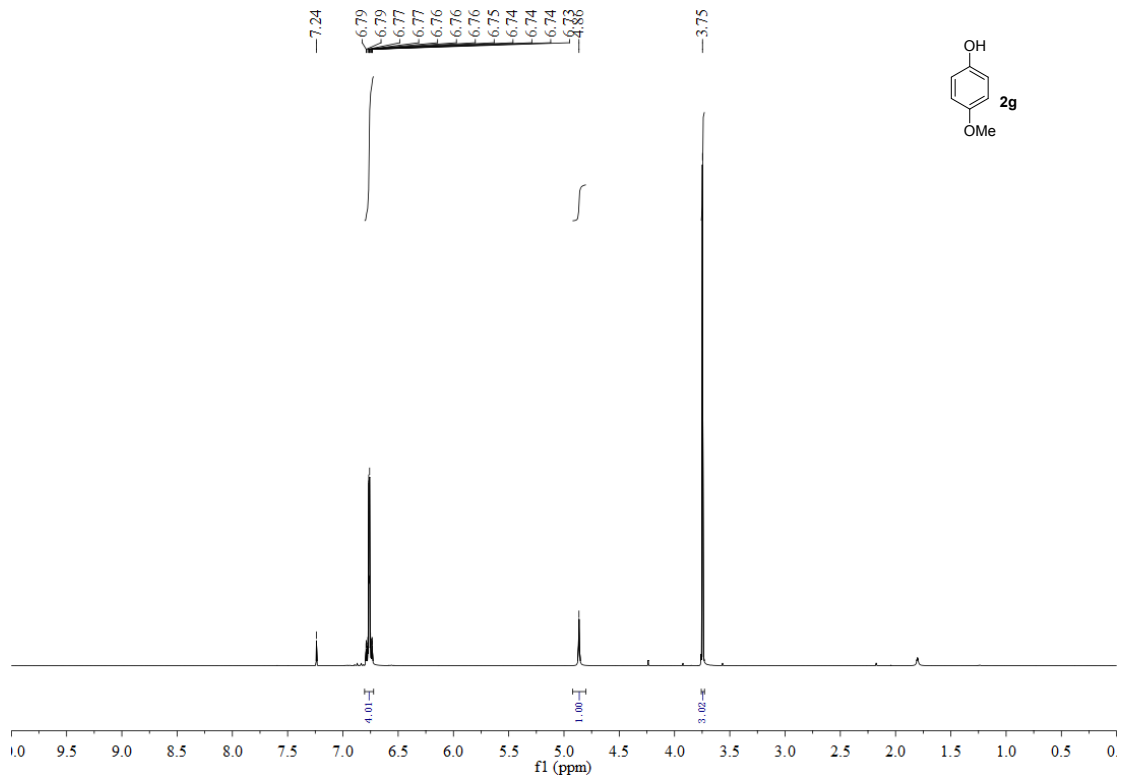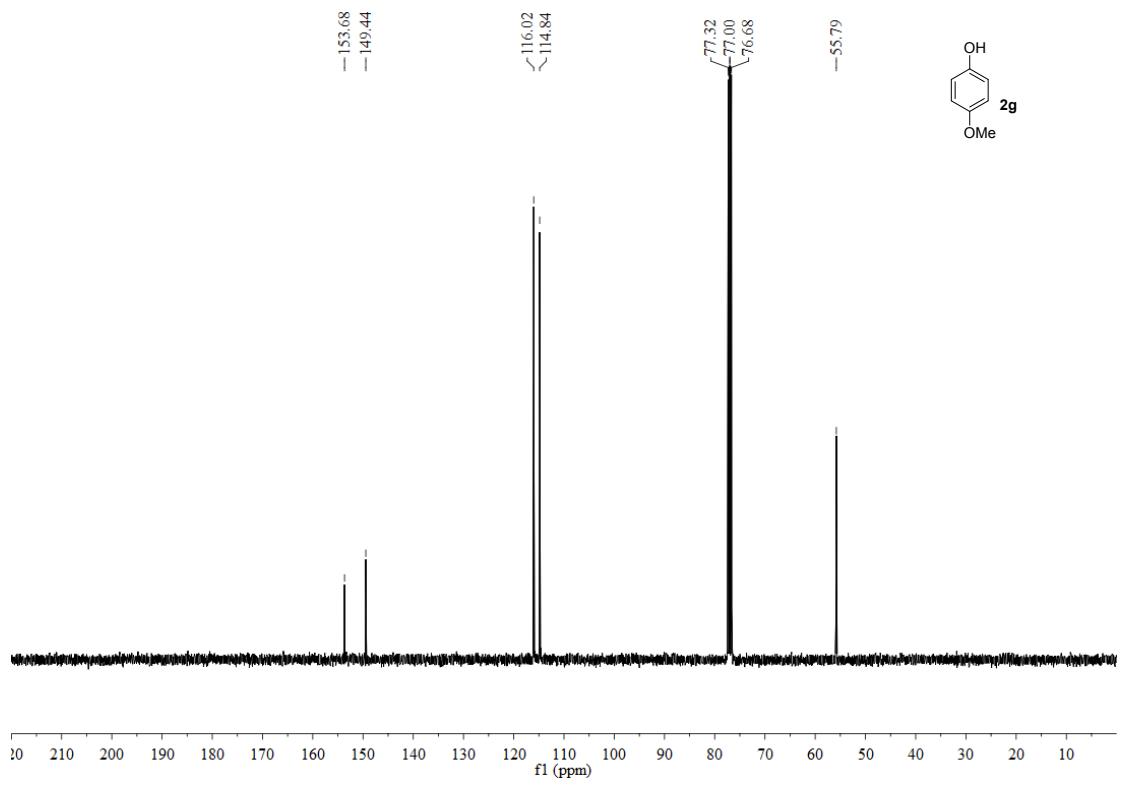

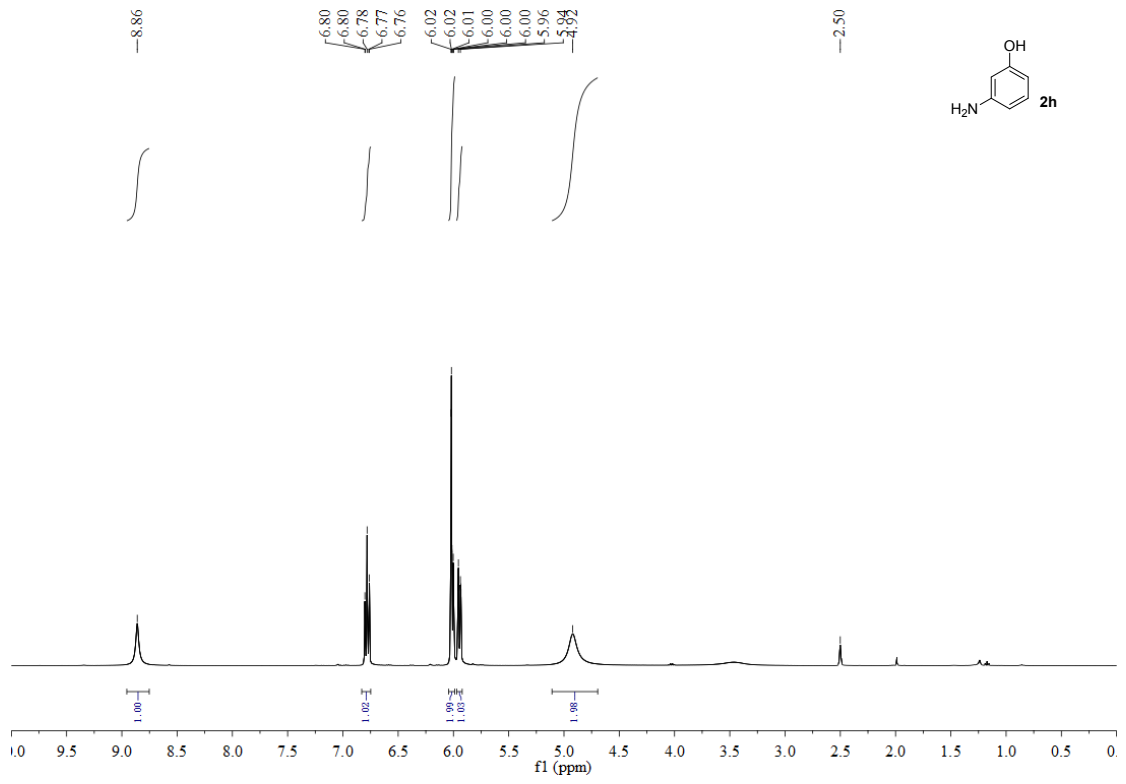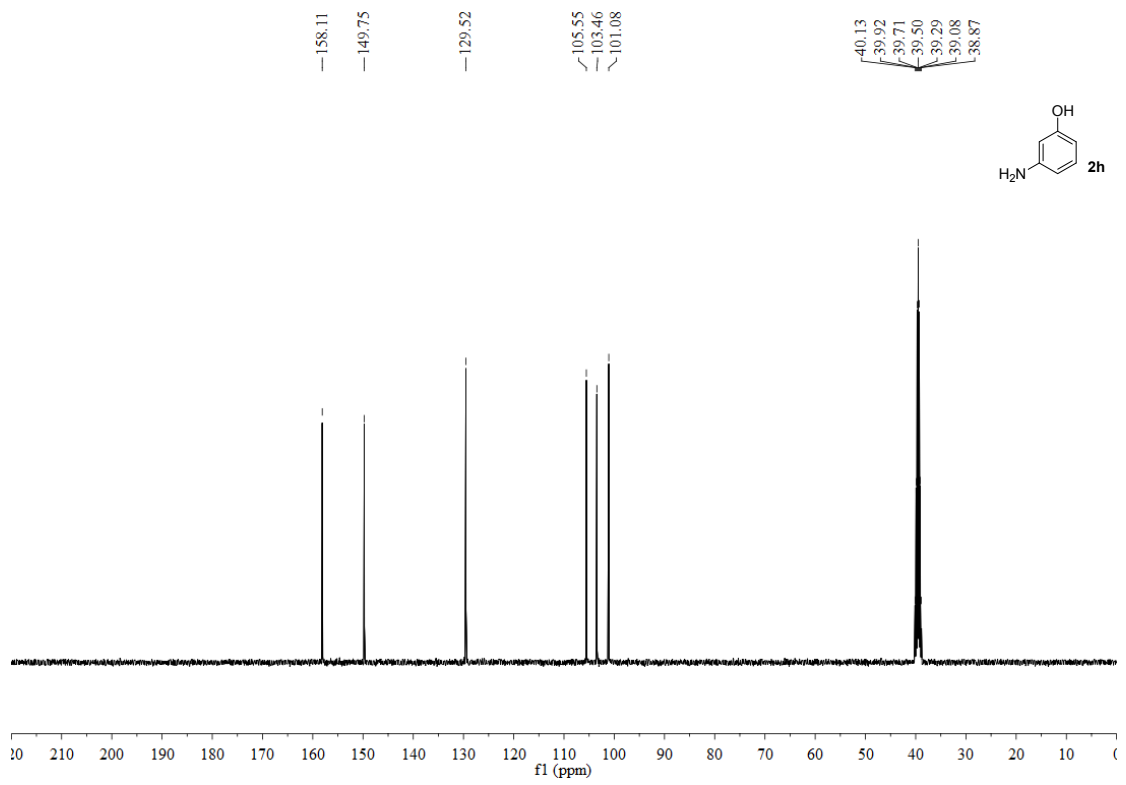



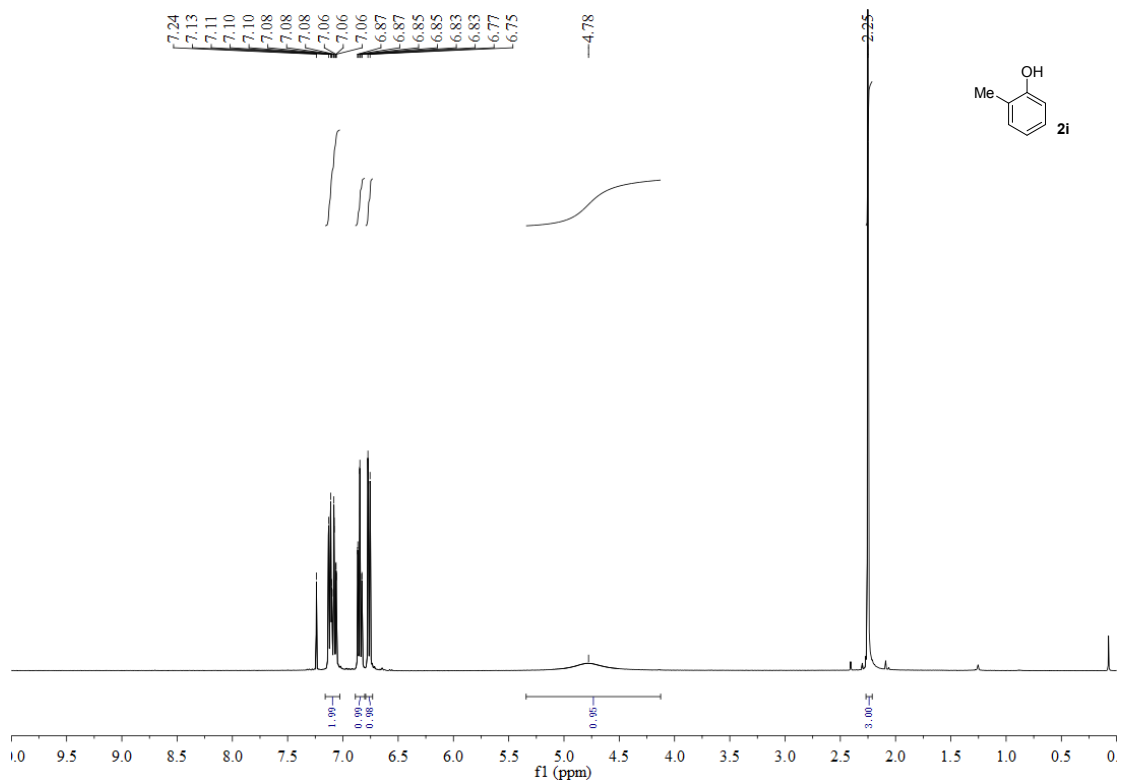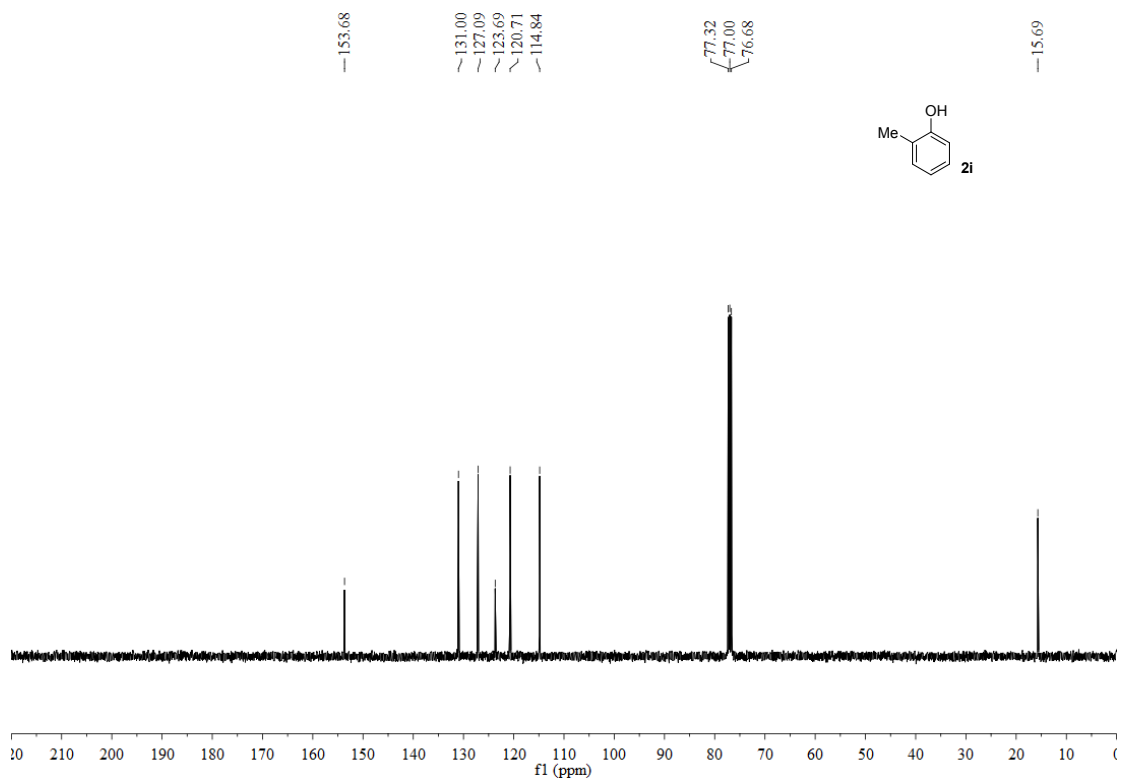

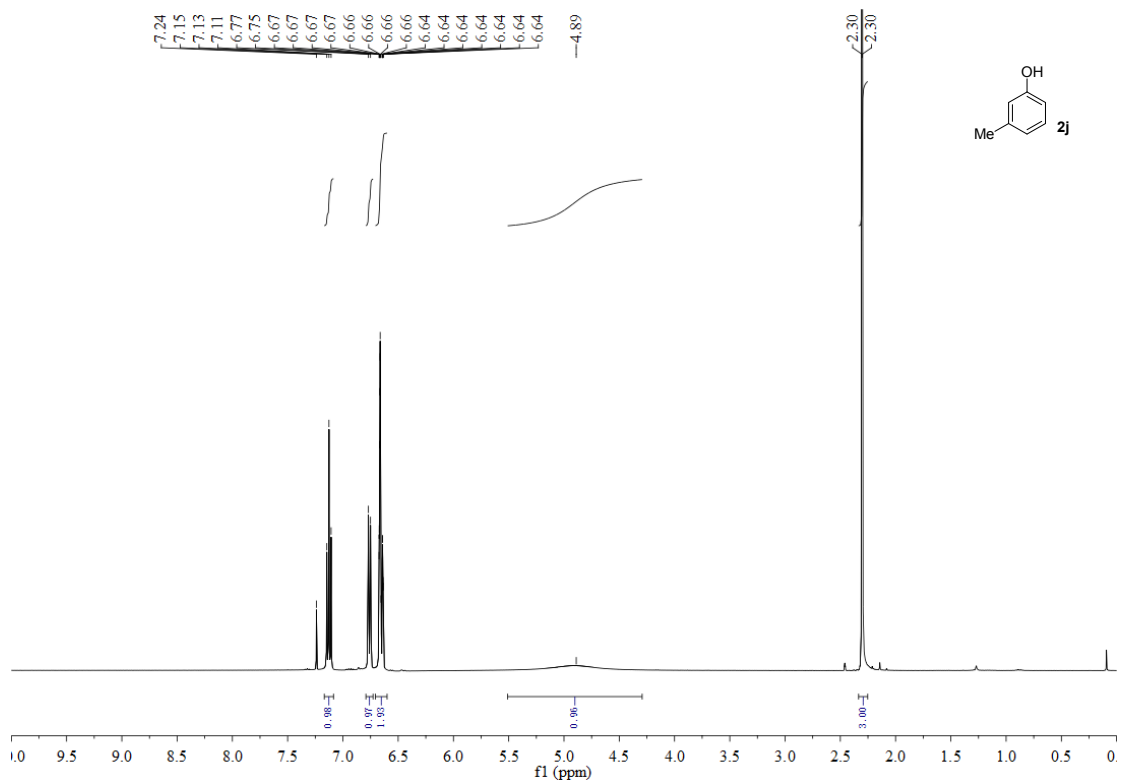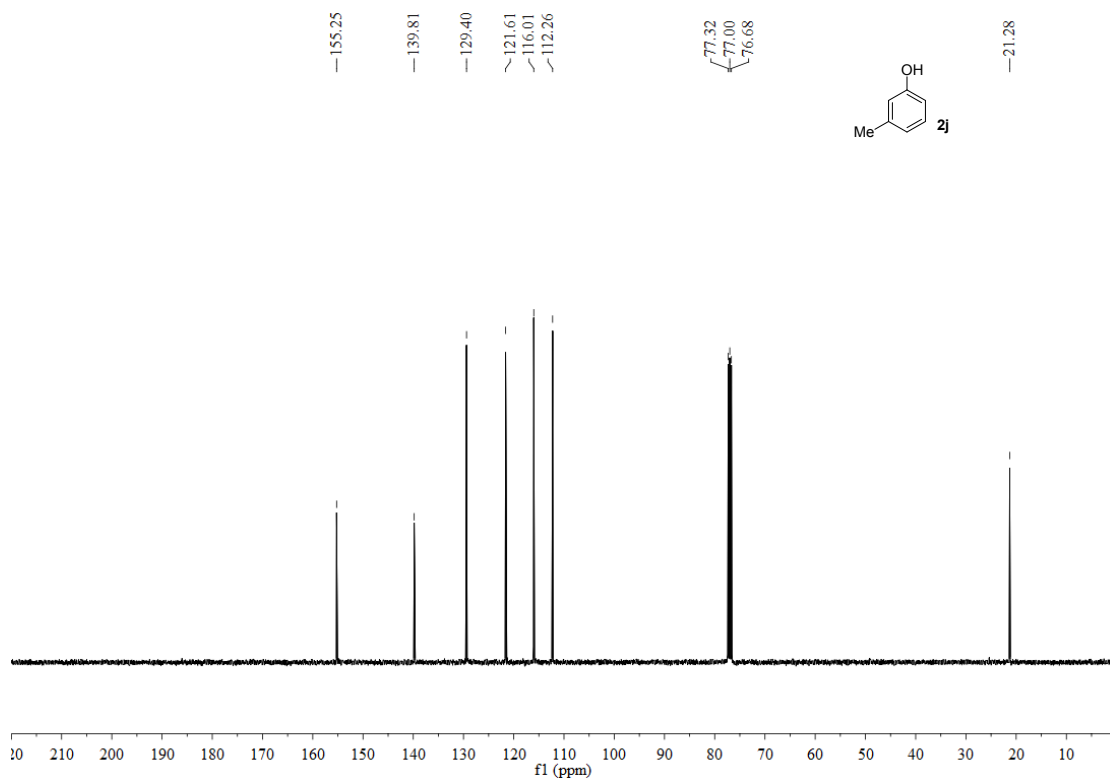

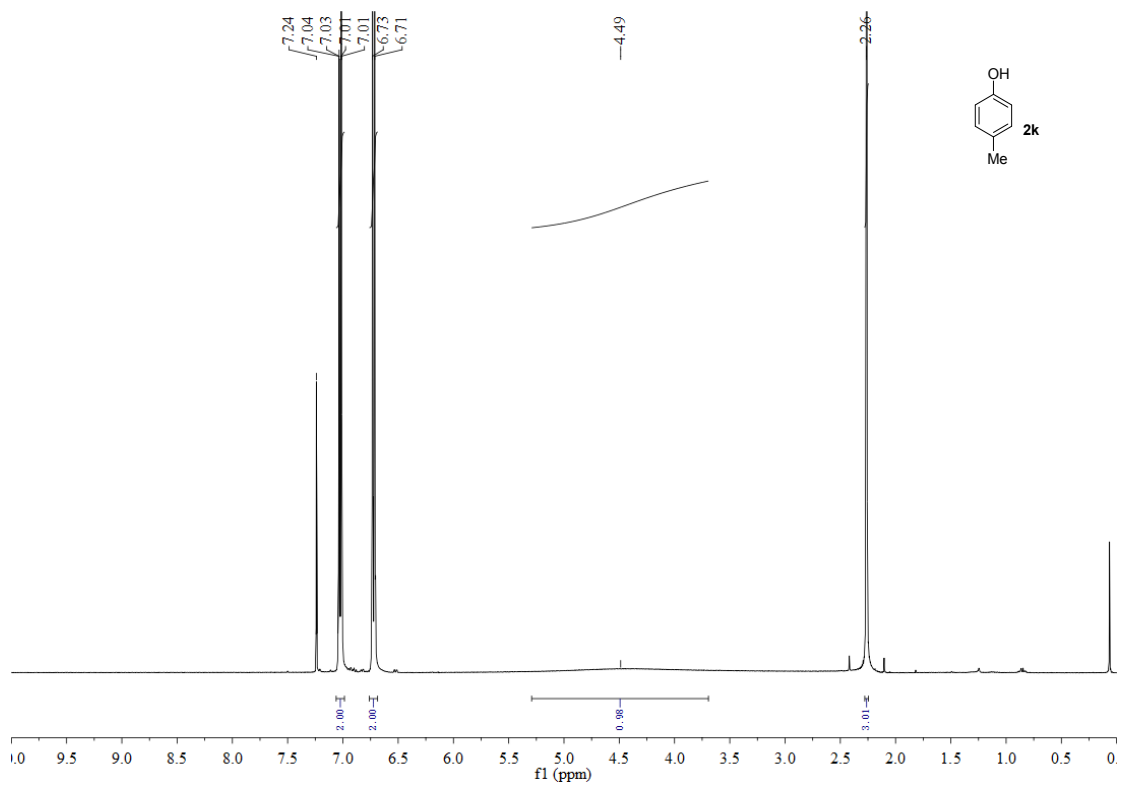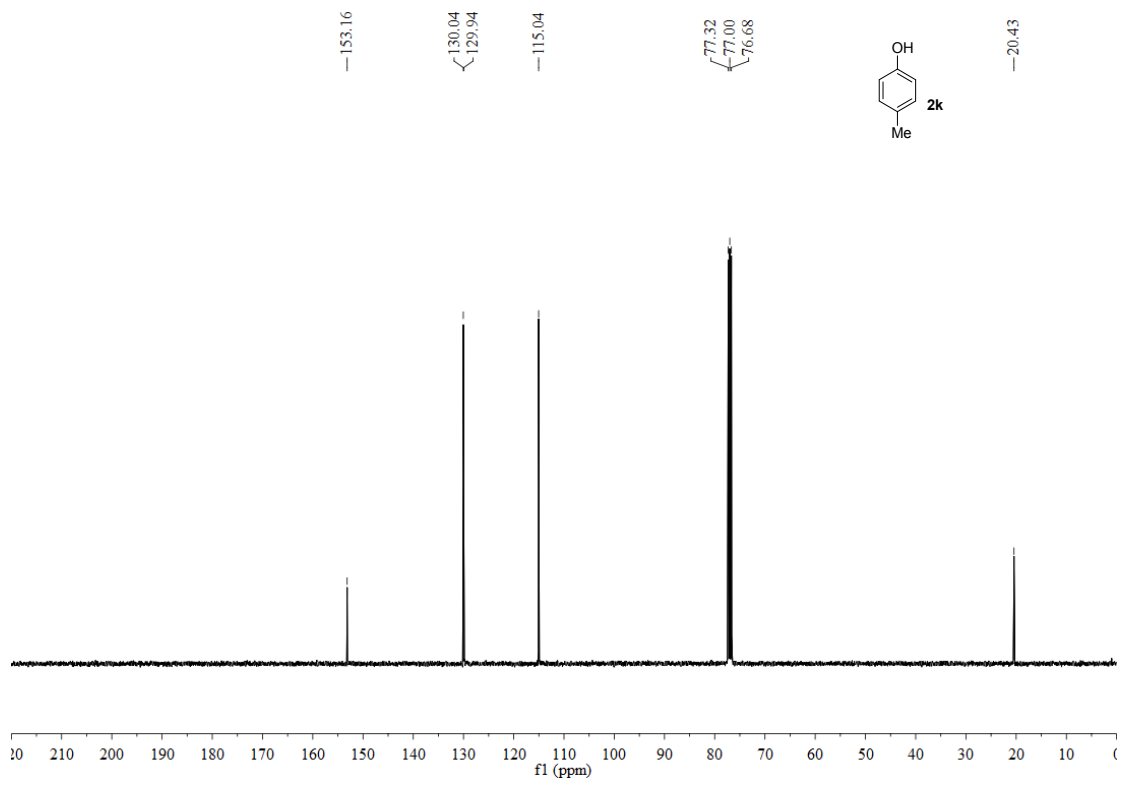

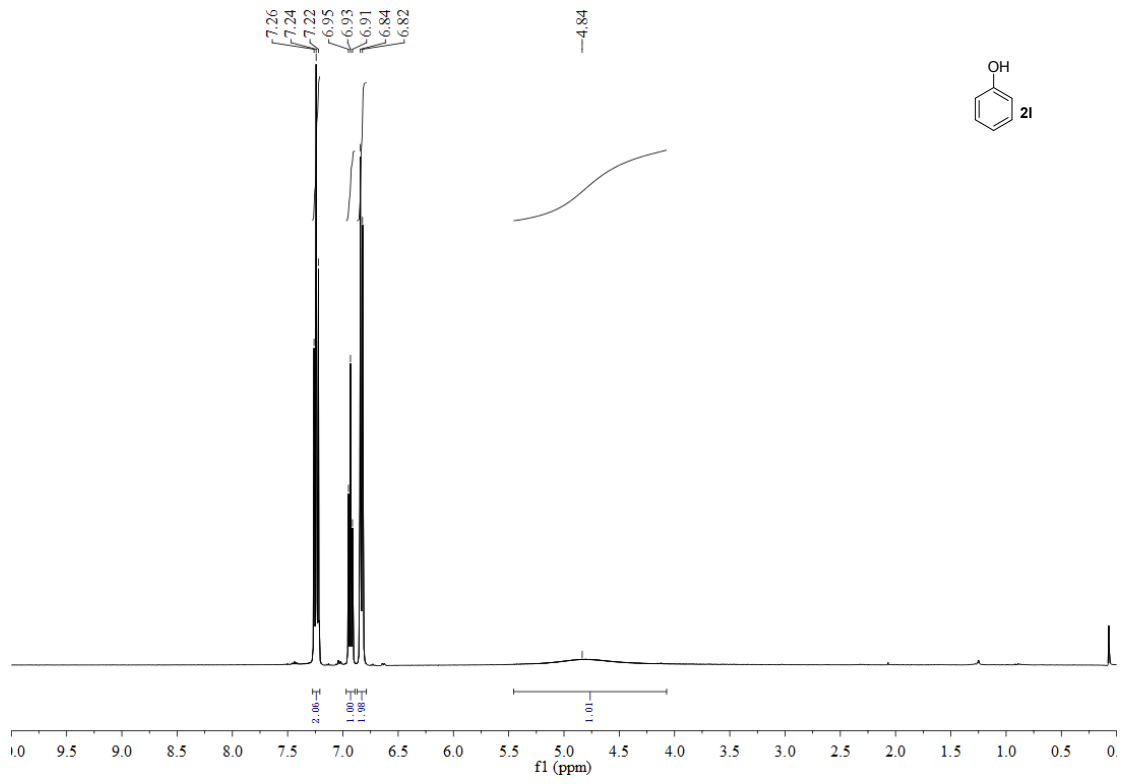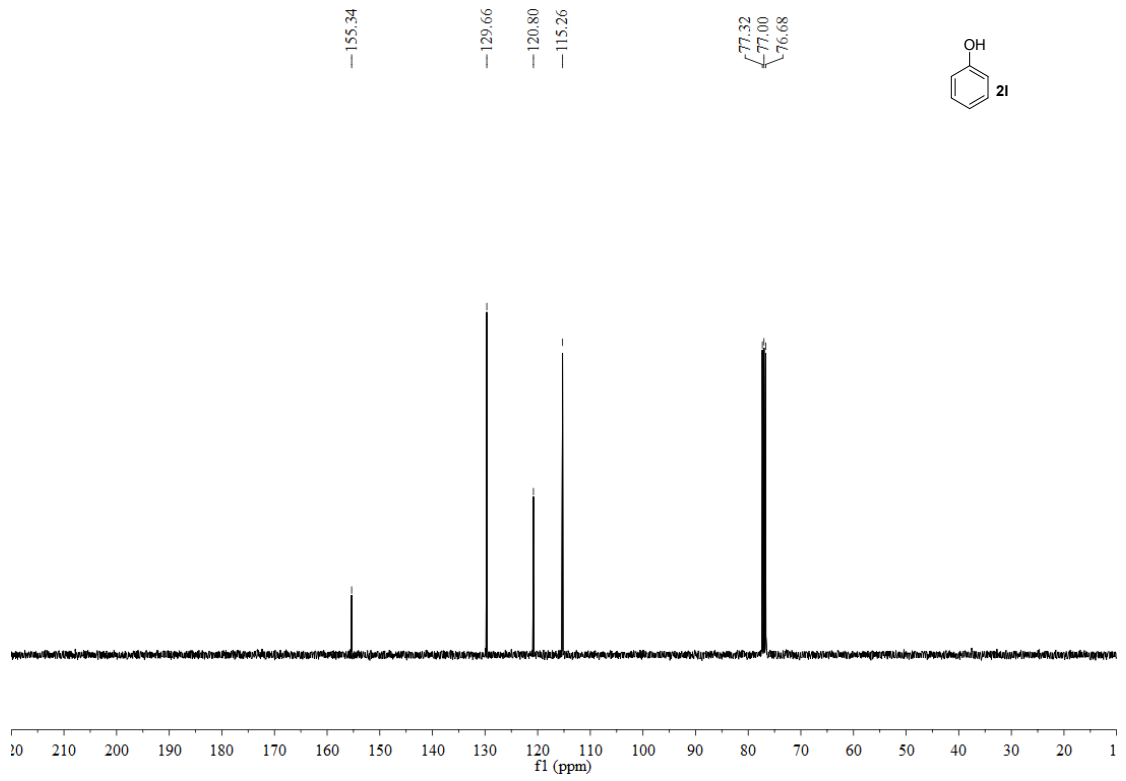

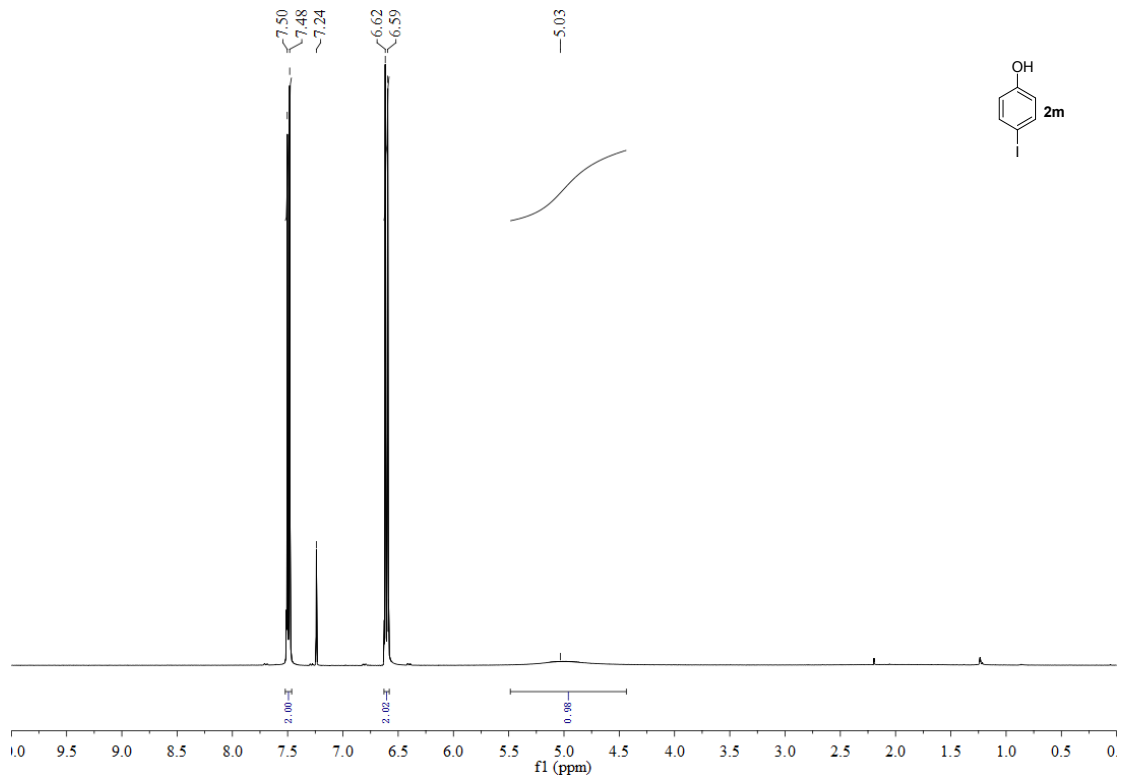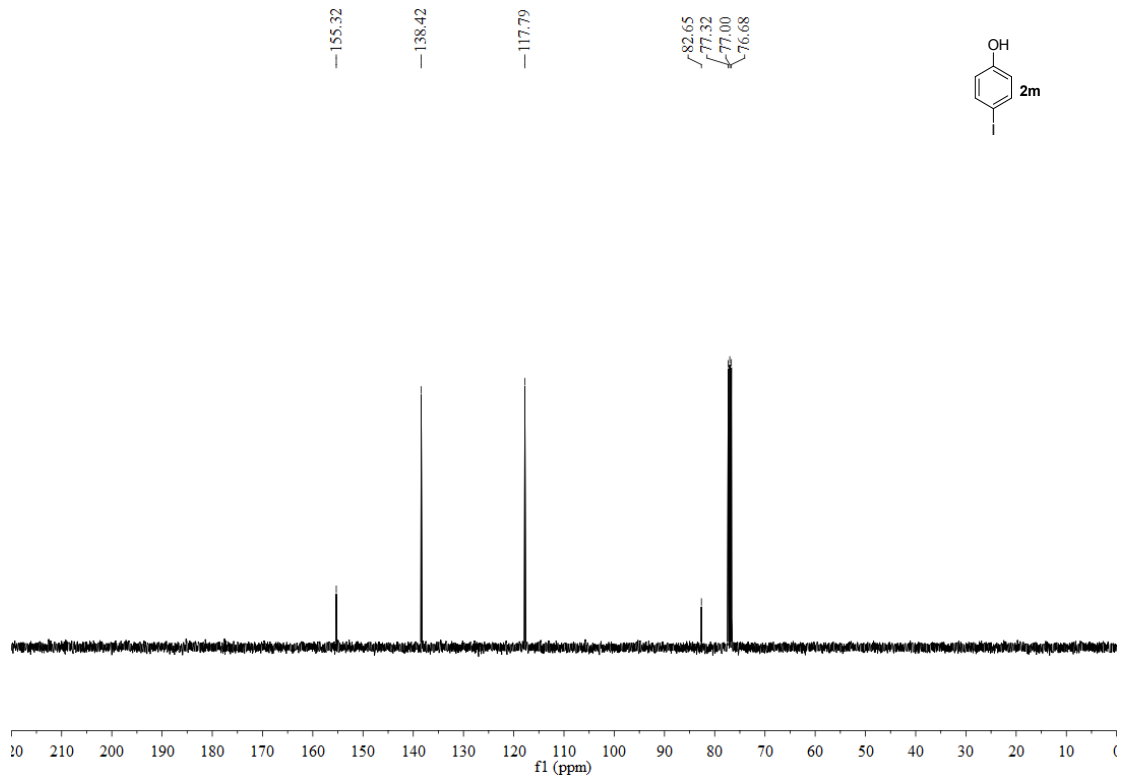

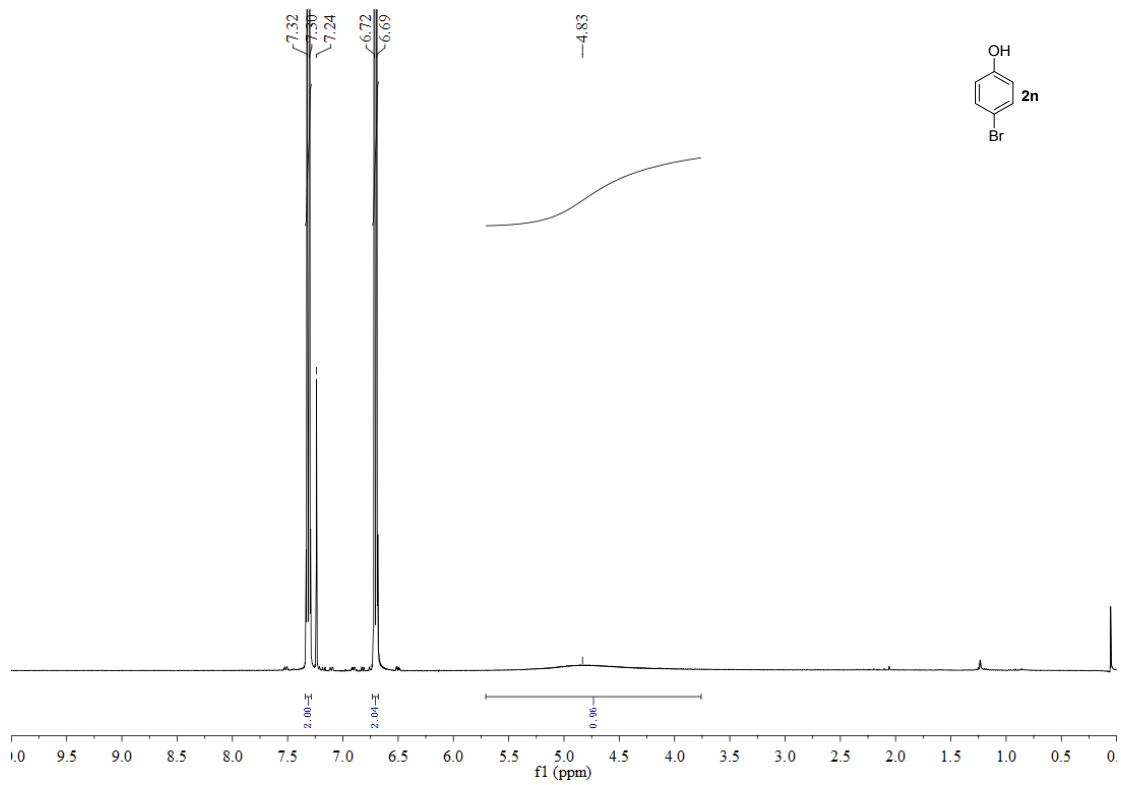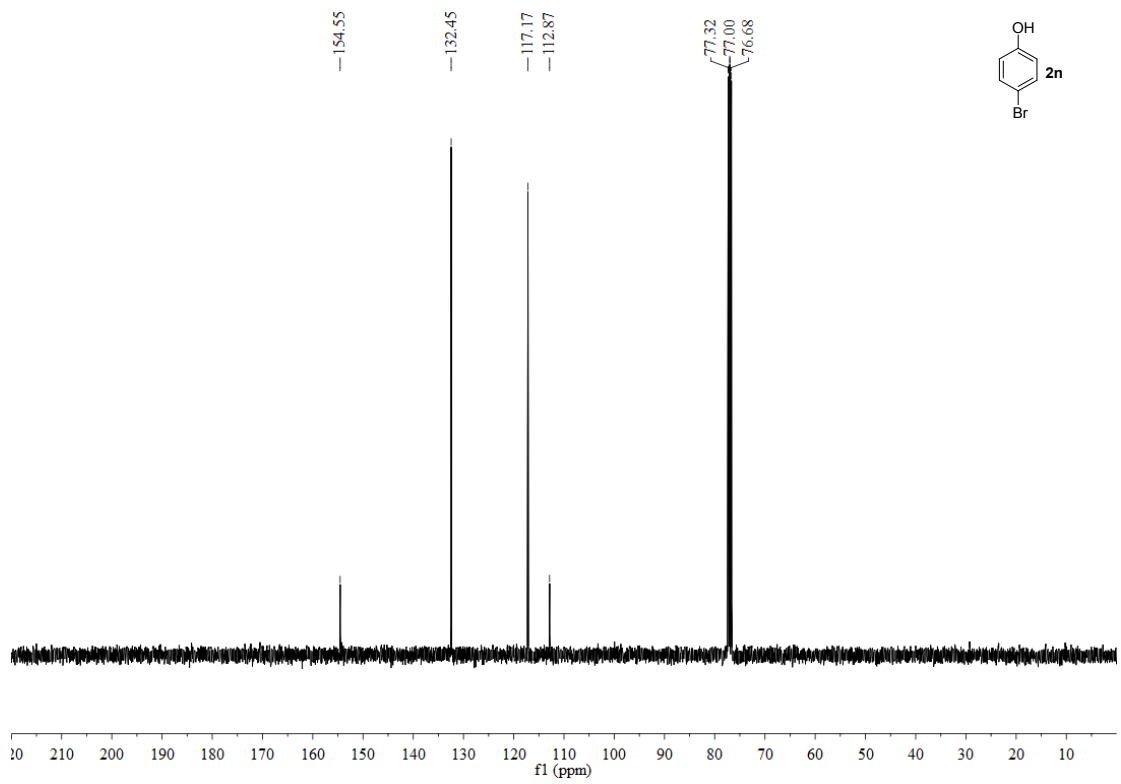

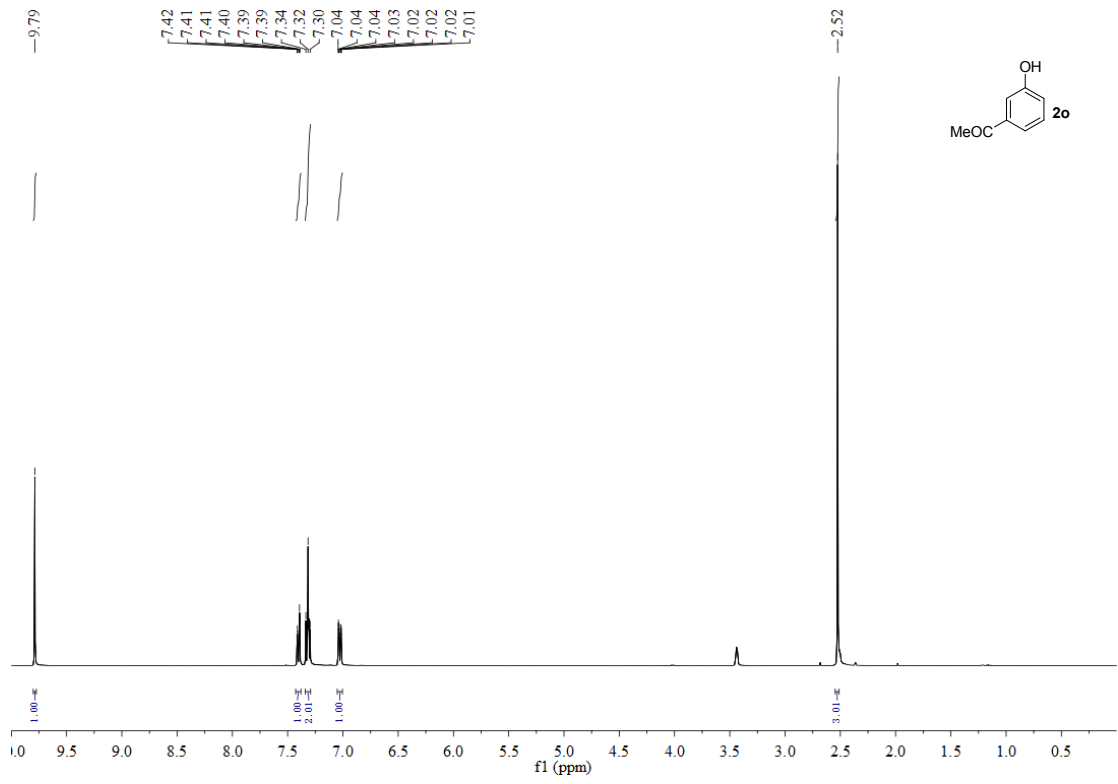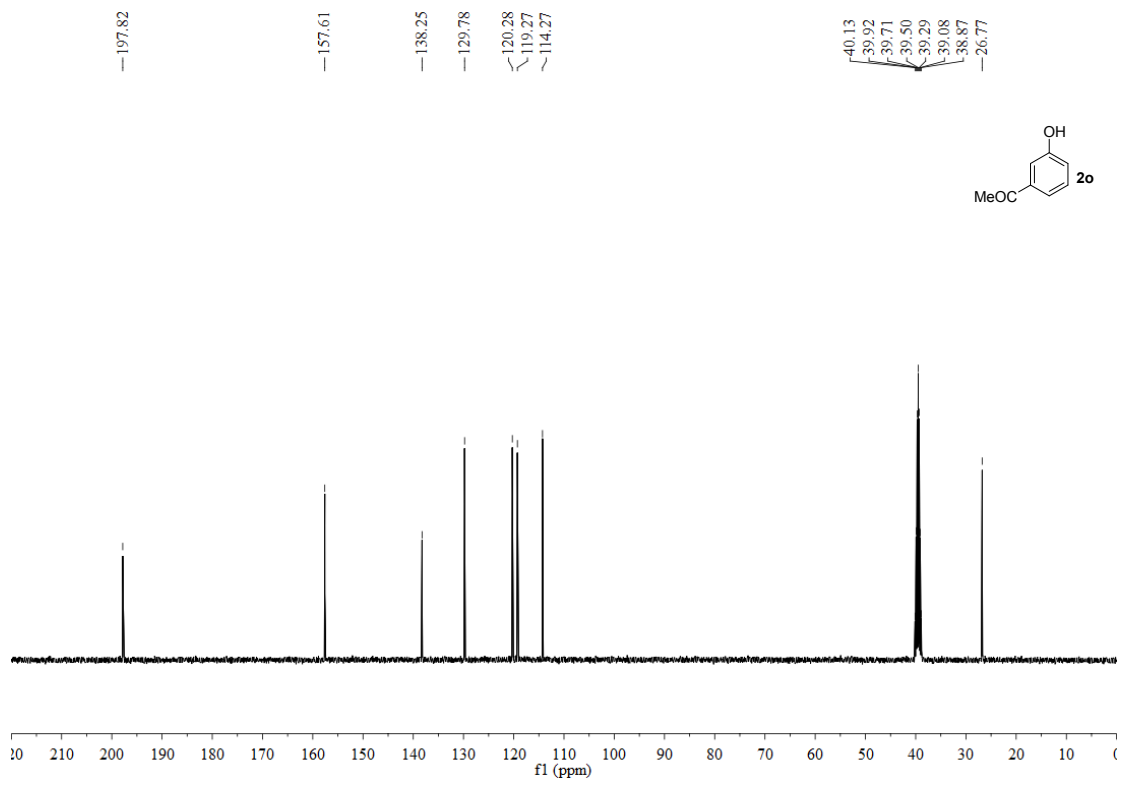

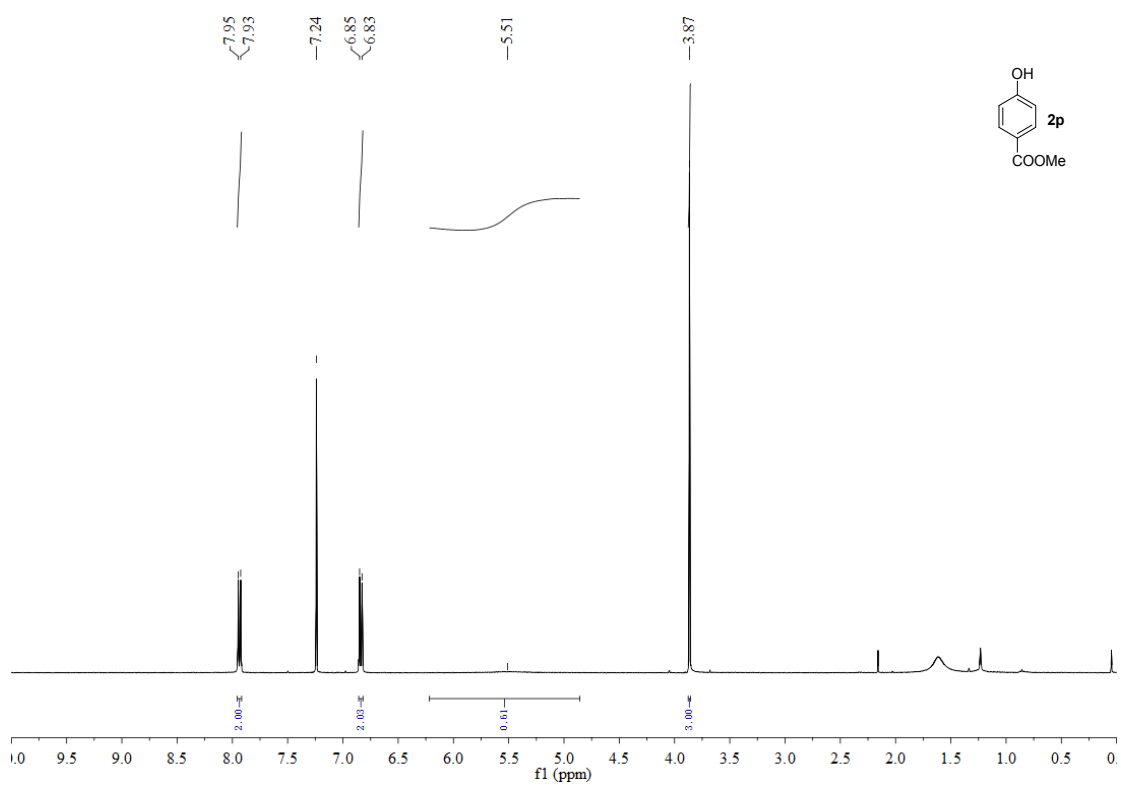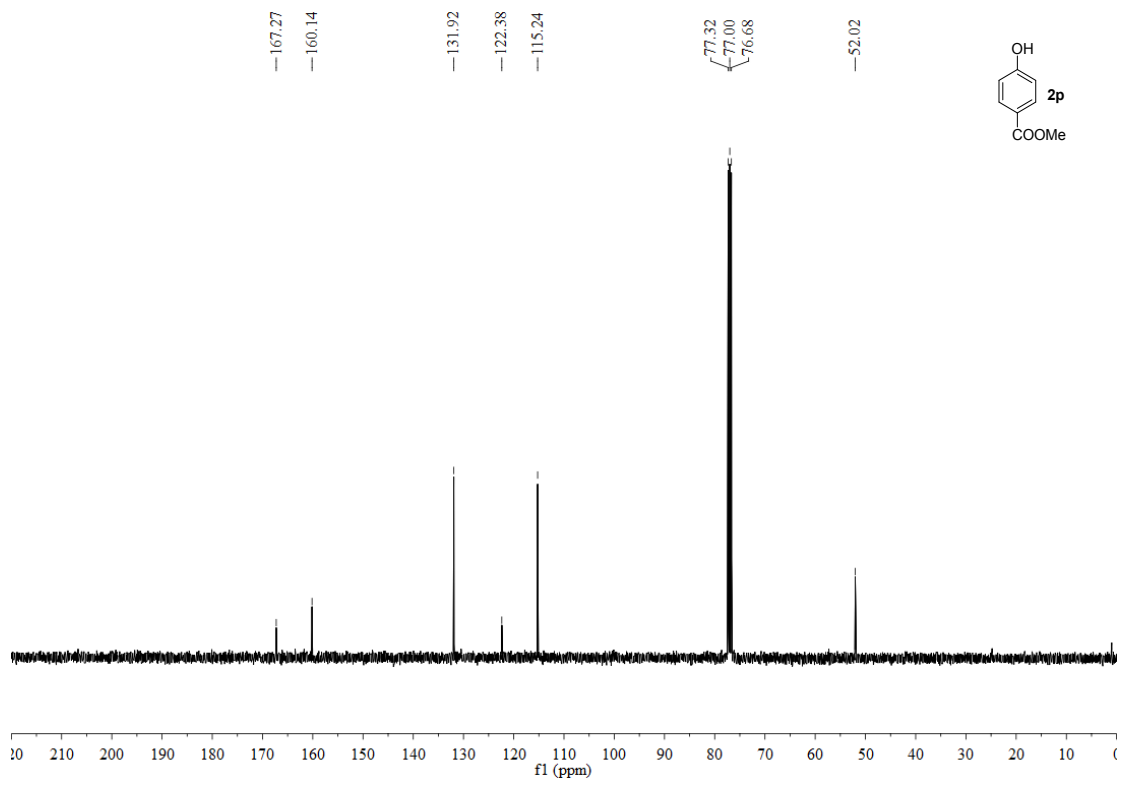



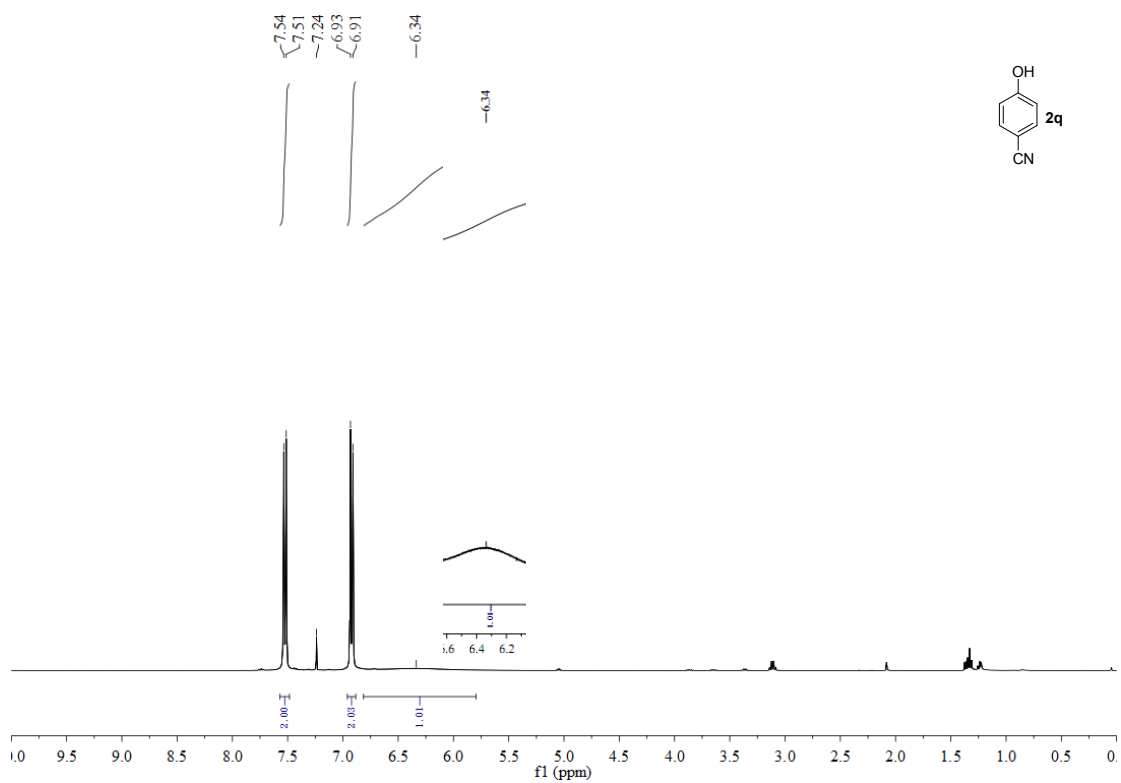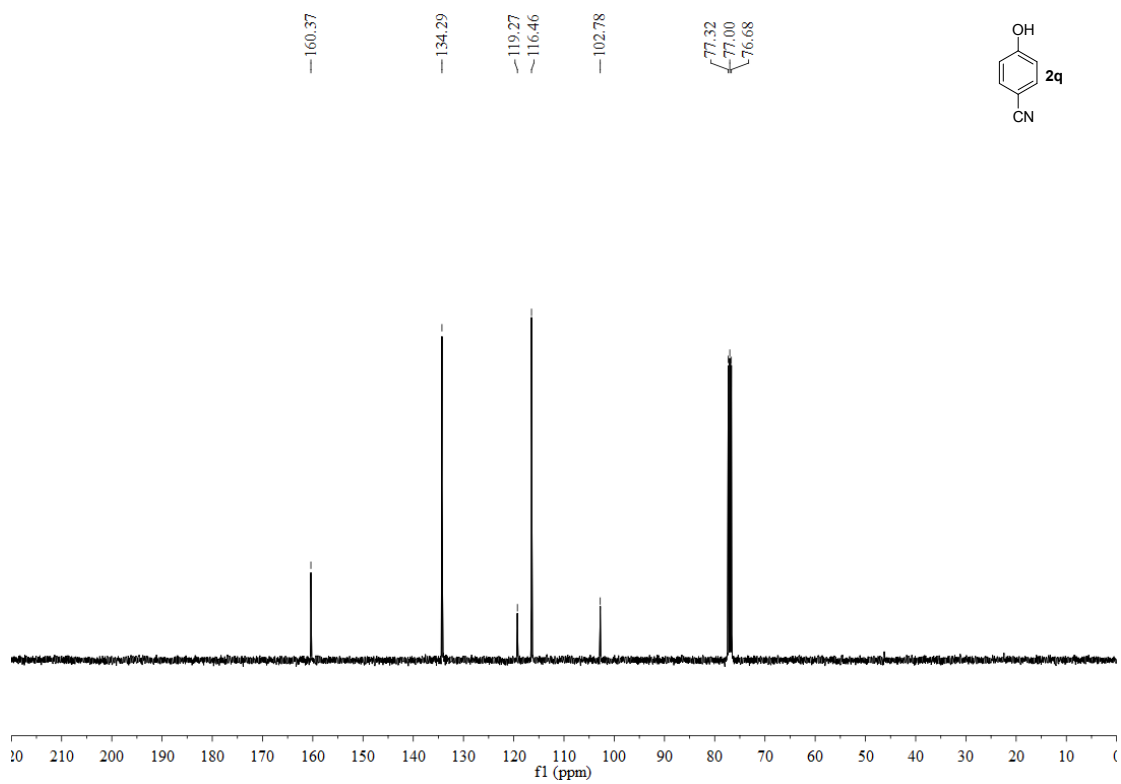

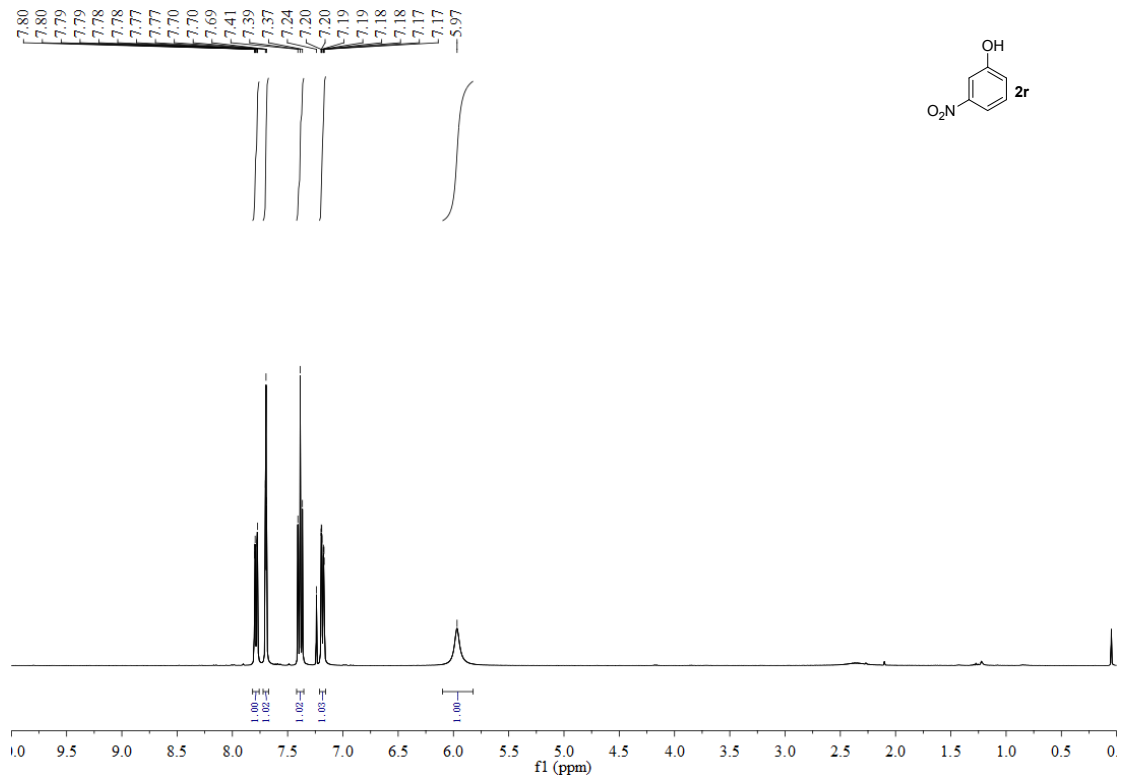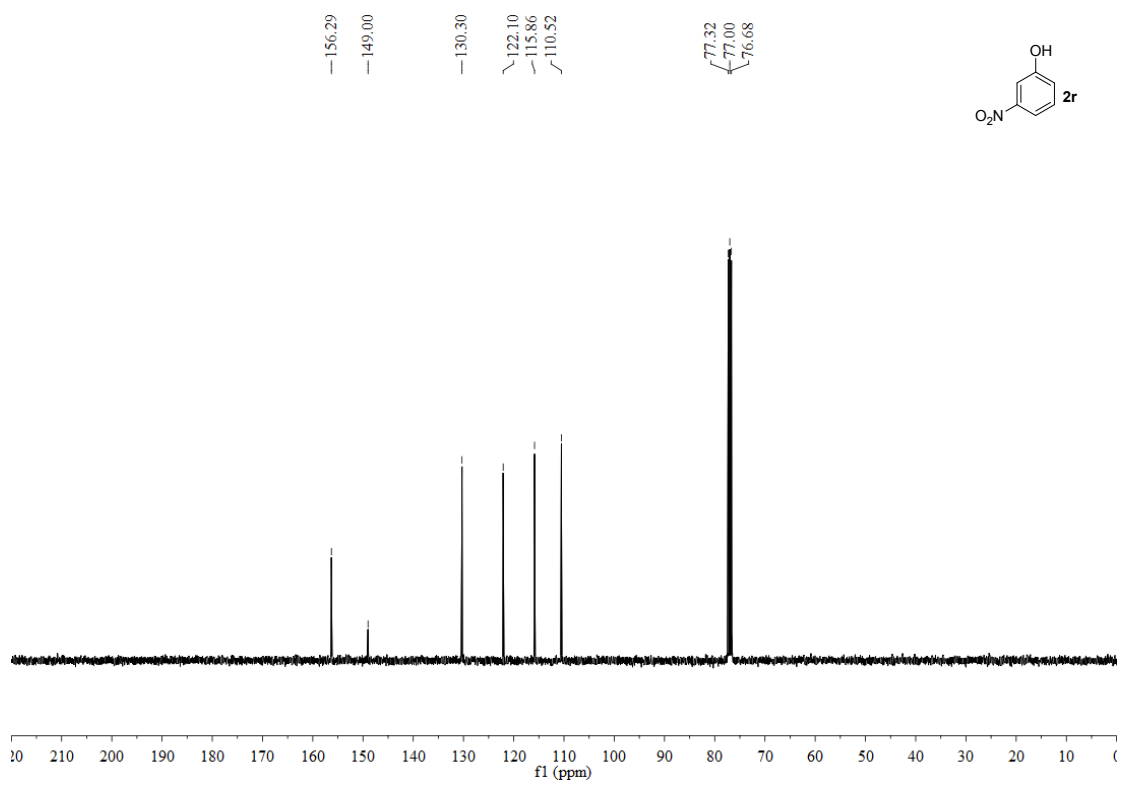

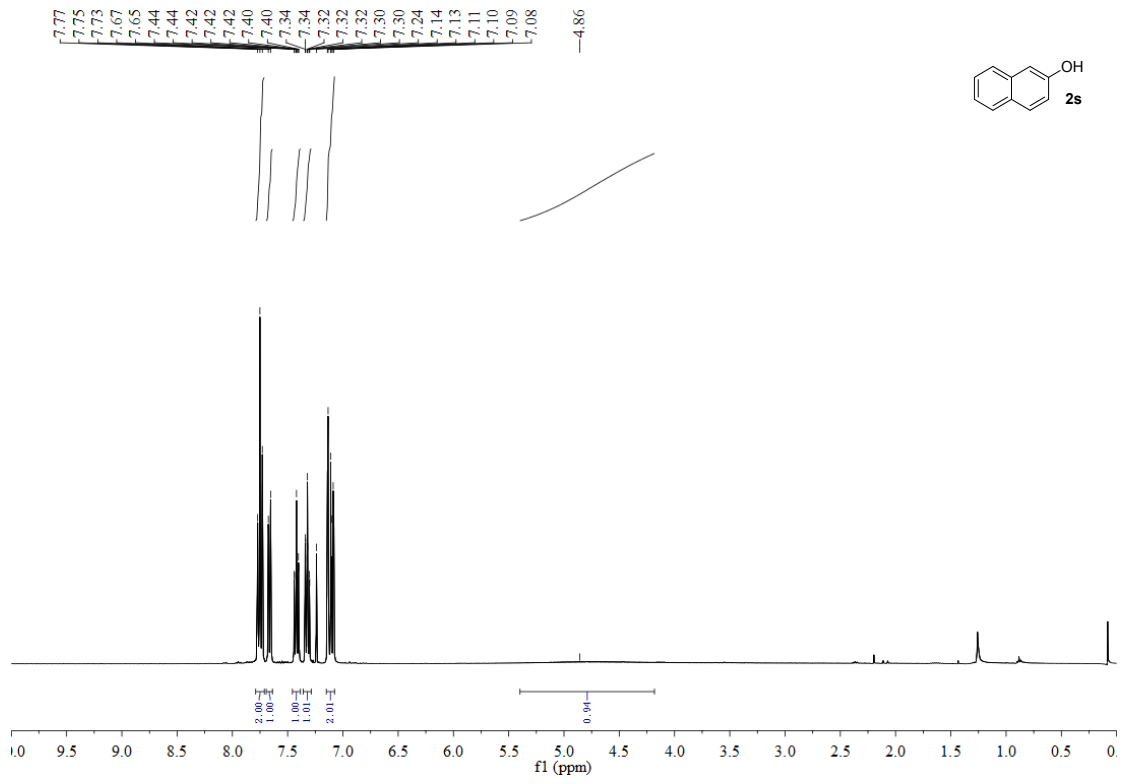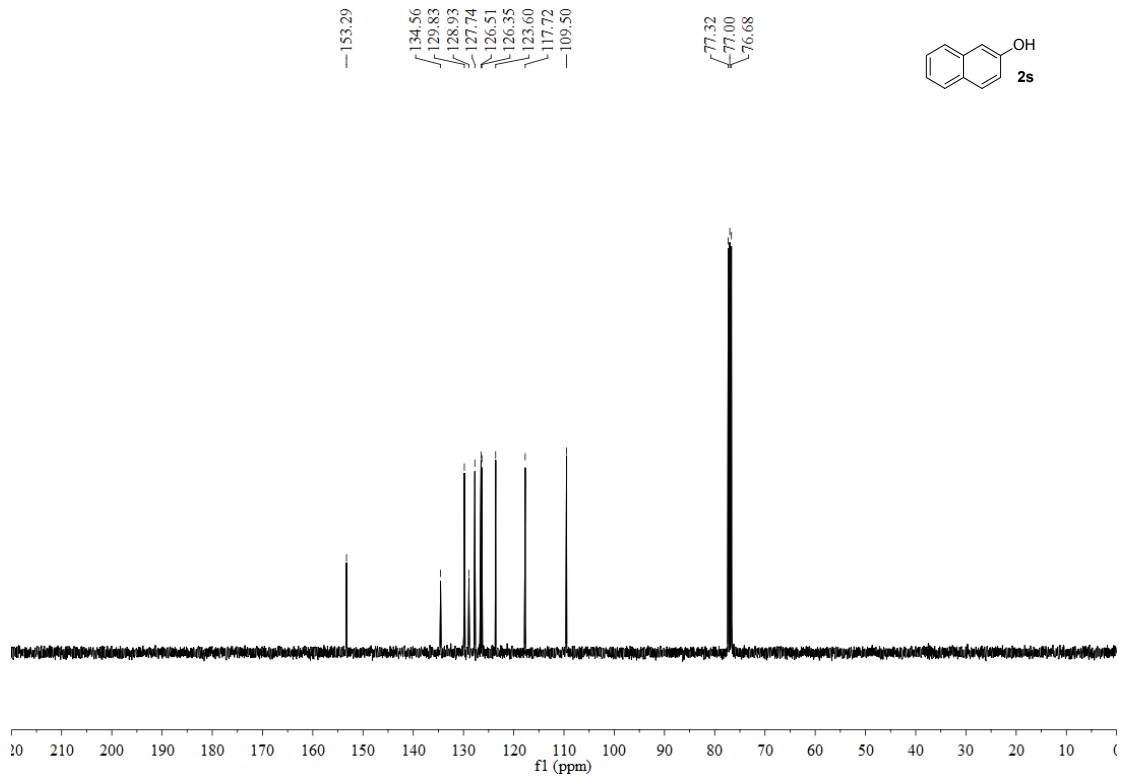

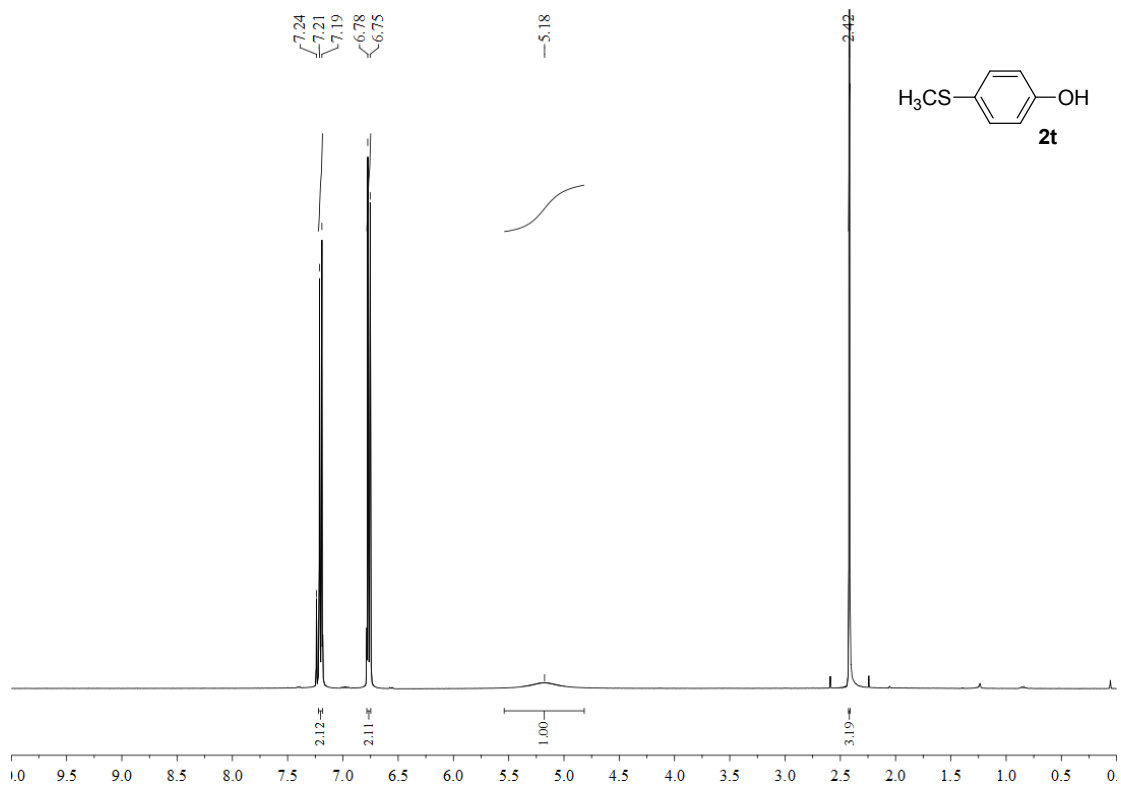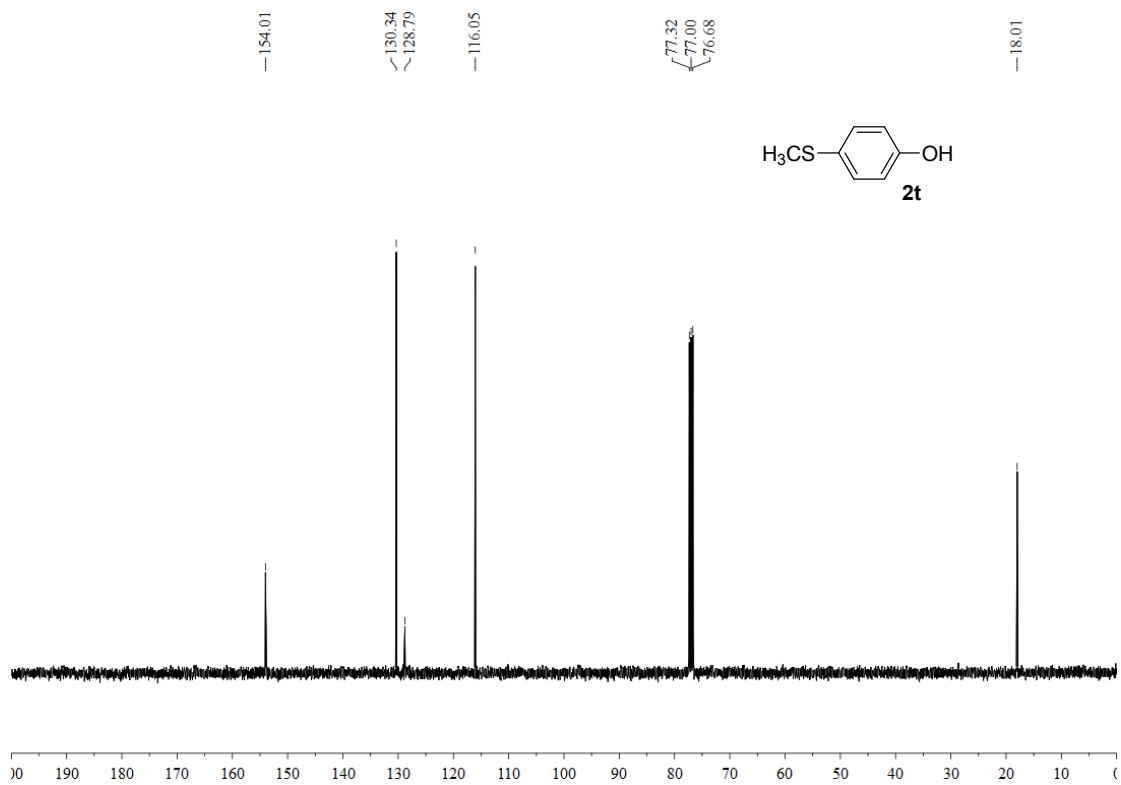

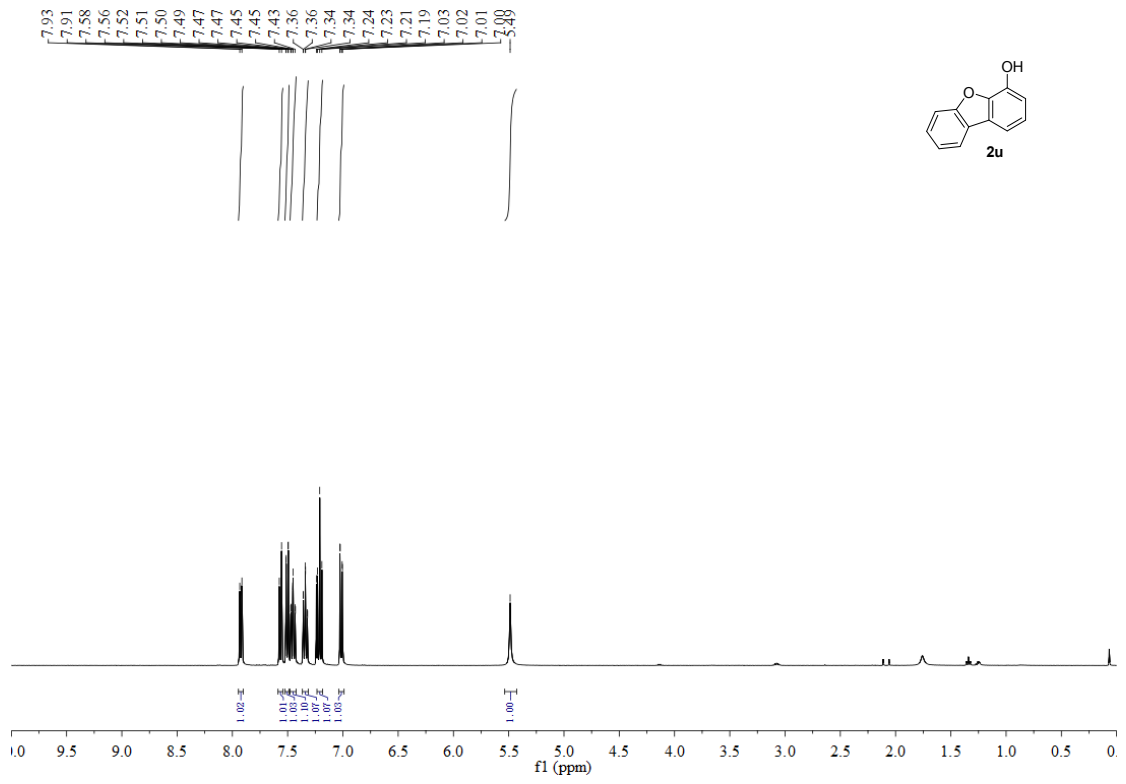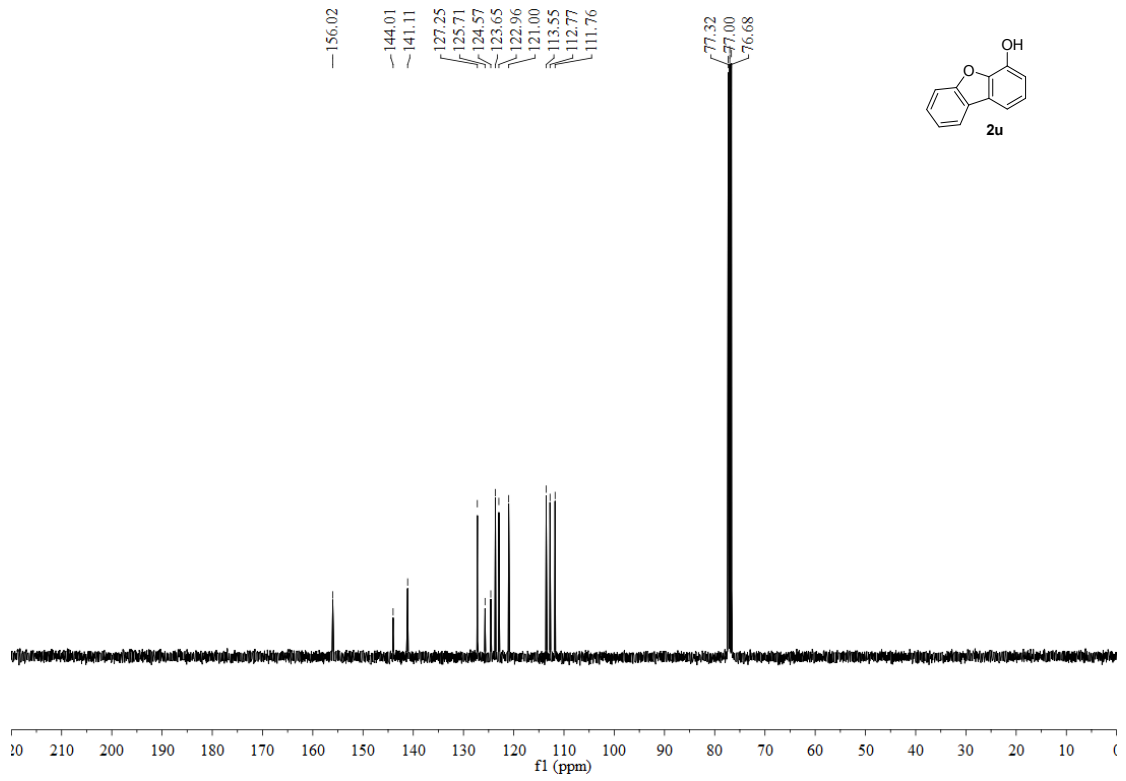

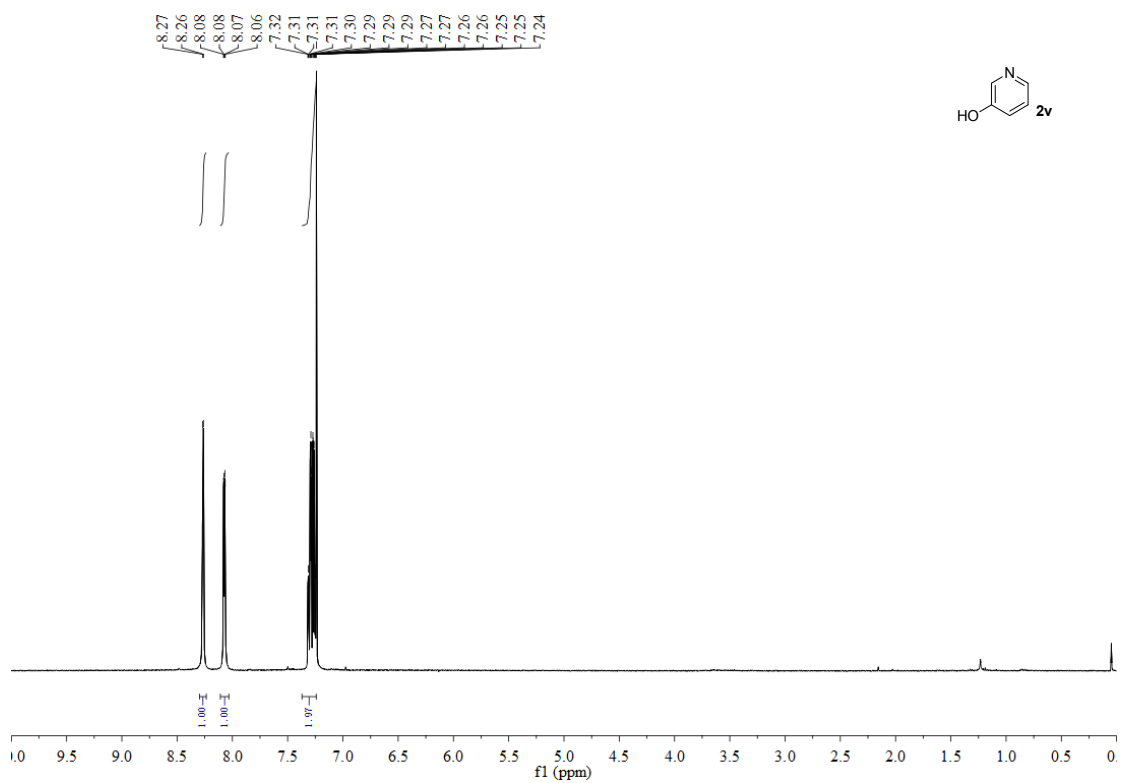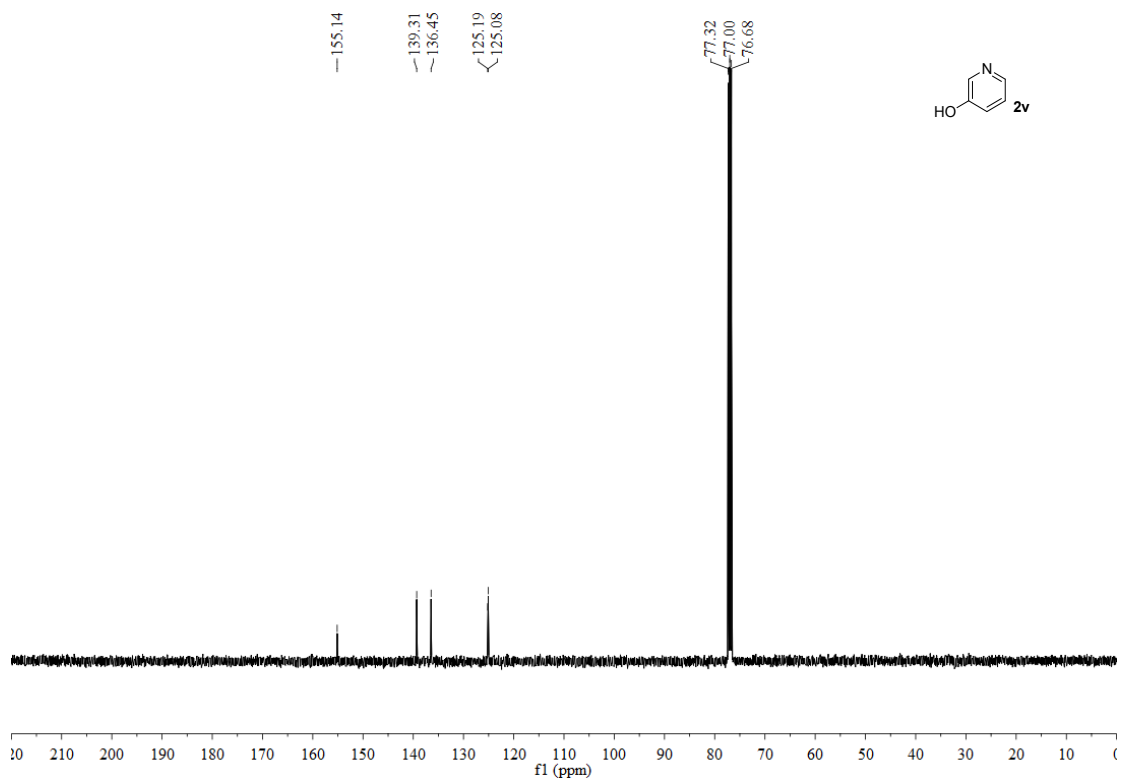

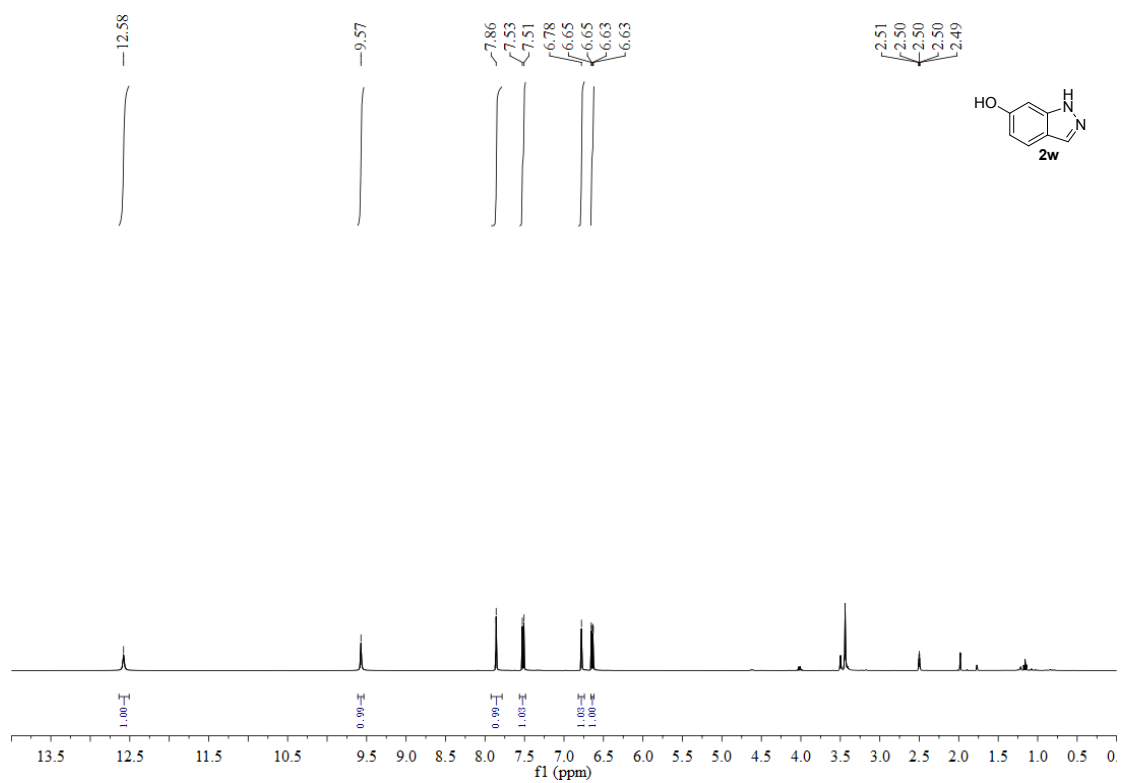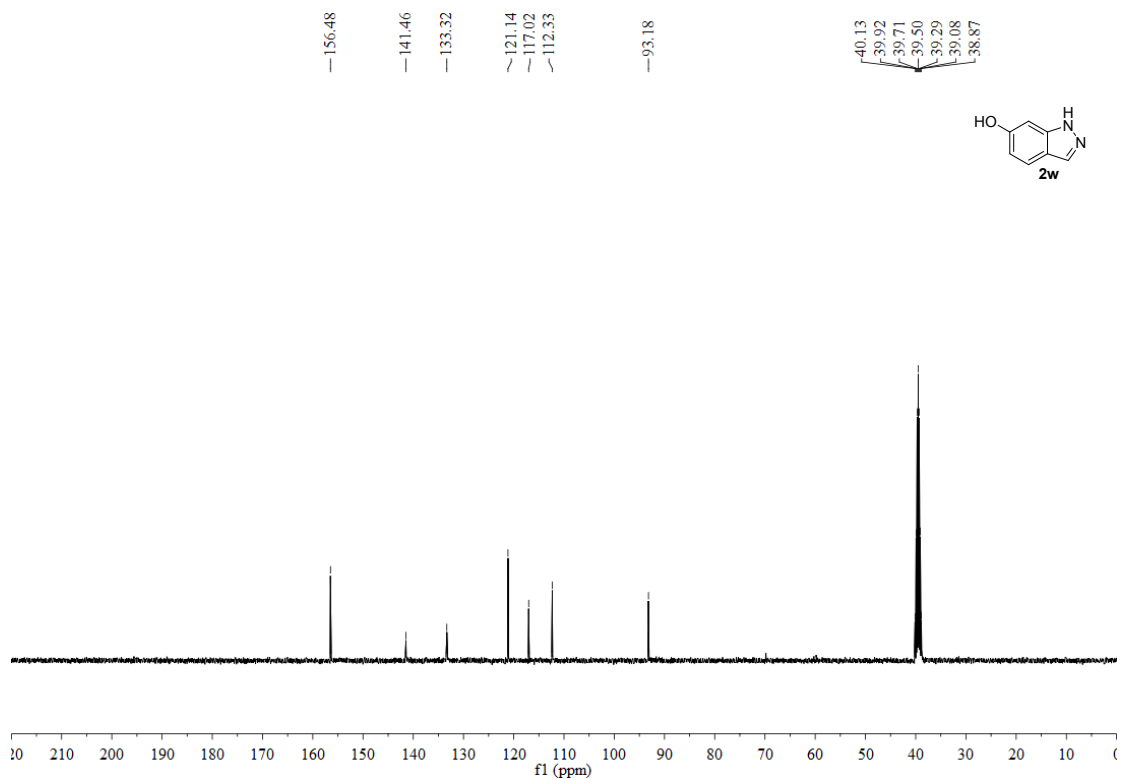

Supplement: c4ra05589f1.pdf [file c4ra05589f1.pdf]
